# Supplementary material
Source: PubMed Central journal article supplement (PMC5056086)
Supplement: pnas.1606043113.sapp.pdf [file pnas.1606043113.sapp.pdf]

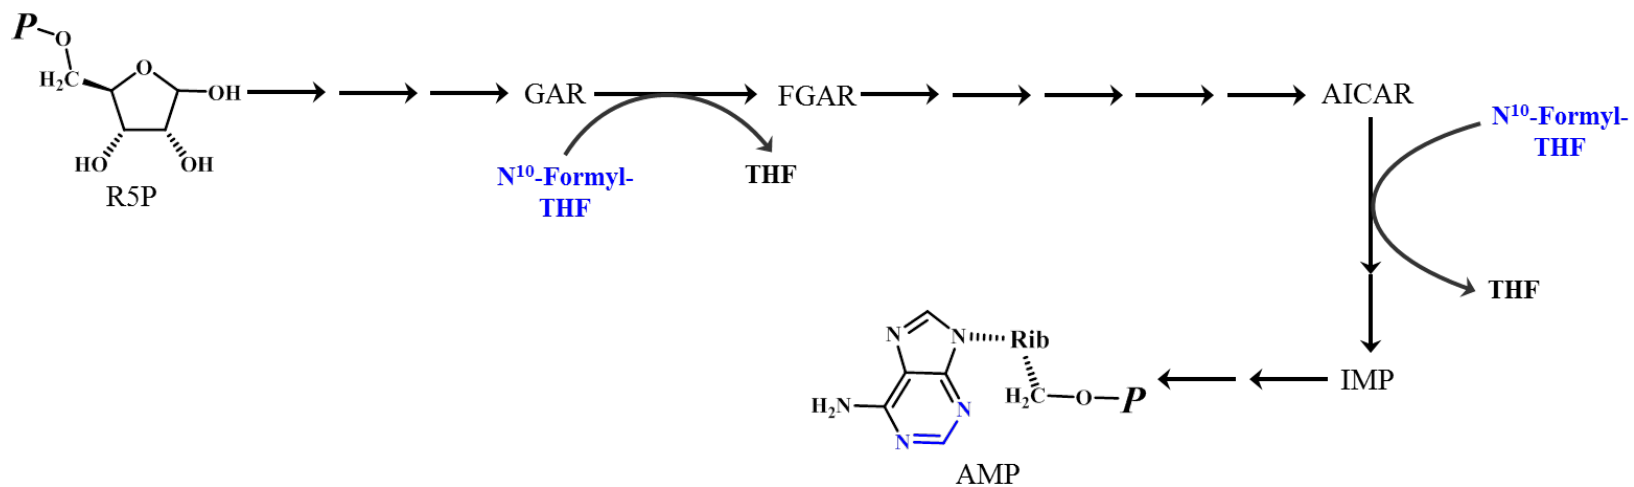

**Figure S1:** Pathway for the synthesis of Adenosine Monophosphate (AMP) from Ribose – 5-Phosphate (R5P). The labeled carbon derived from formyl-THF (from C1 metabolism) for the synthesis of AMP is highlighted in blue. GAR: Glycinamide ribotide; FGAR: Formylglycinamide ribotide; AICAR: Aminoimidazole-4-carboxamide ribotide; IMP: Inosine monophosphate.

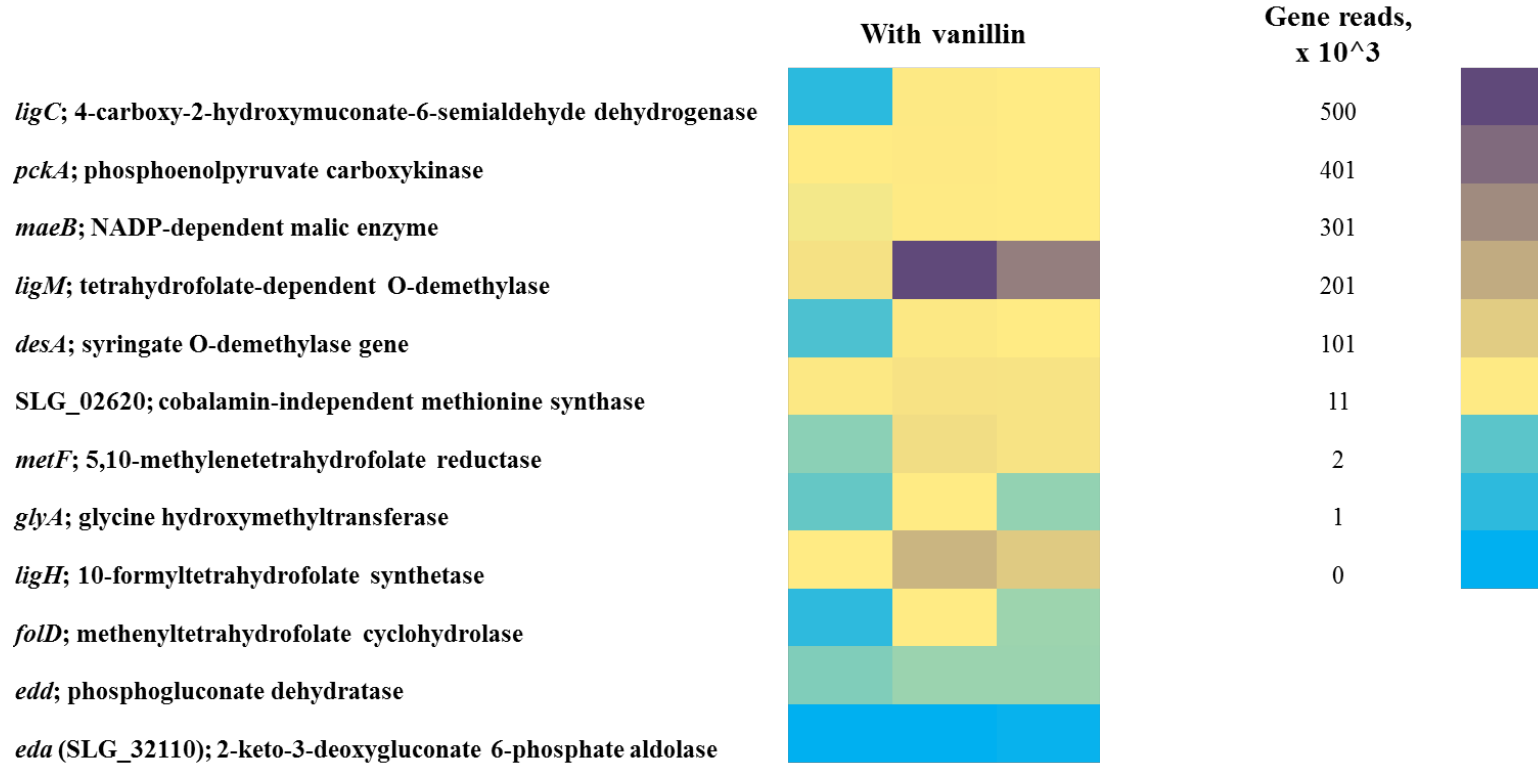

**Figure S2:** Heat map showing the gene reads obtained through RNA-seq analysis for genes involved in the C1-THF pathway and the cataplerotic pathway of SYK-6 grown in the presence of vanillin. In comparison to *ligC*, a critical gene of the vanillin catabolic pathway these genes are observed to be relatively well expressed. The results are presented in triplicates.

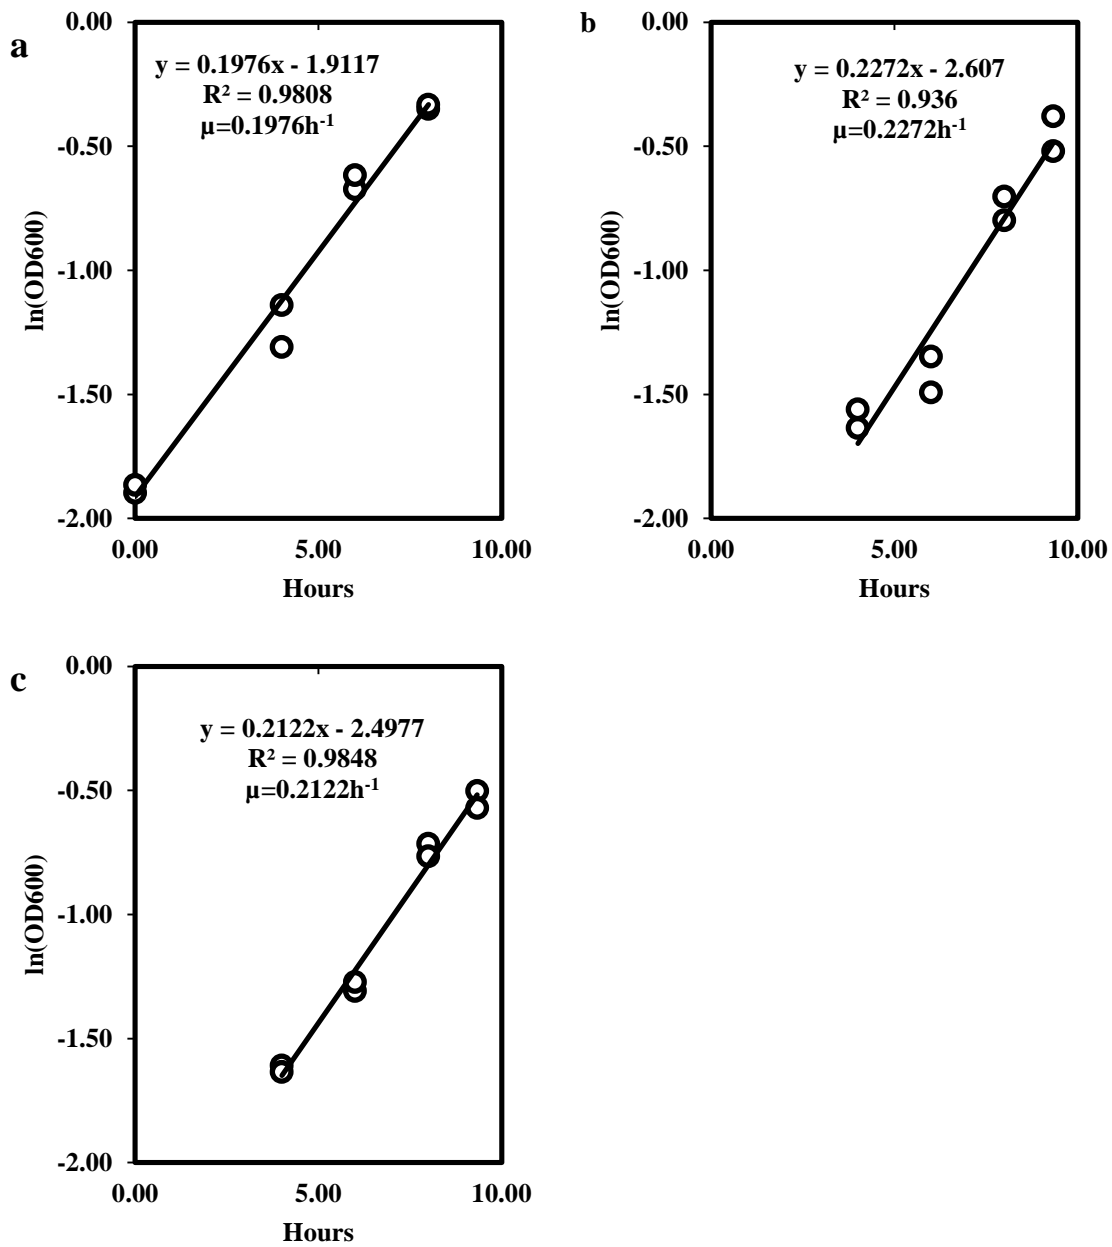

**Figure S3:** Specific growth rates of *Spingobium* SYK-6 growing on  $^{13}\text{C}$ -ring vanillin (a),  $^{13}\text{C}$ -aldehyde vanillin (b), and 50%  $^{13}\text{C}$ -ring vanillin and 50%  $^{13}\text{C}$ -aldehyde vanillin (c). The specific growth rates are determined by linear regression of time and  $\ln(\text{OD}_{600})$ .

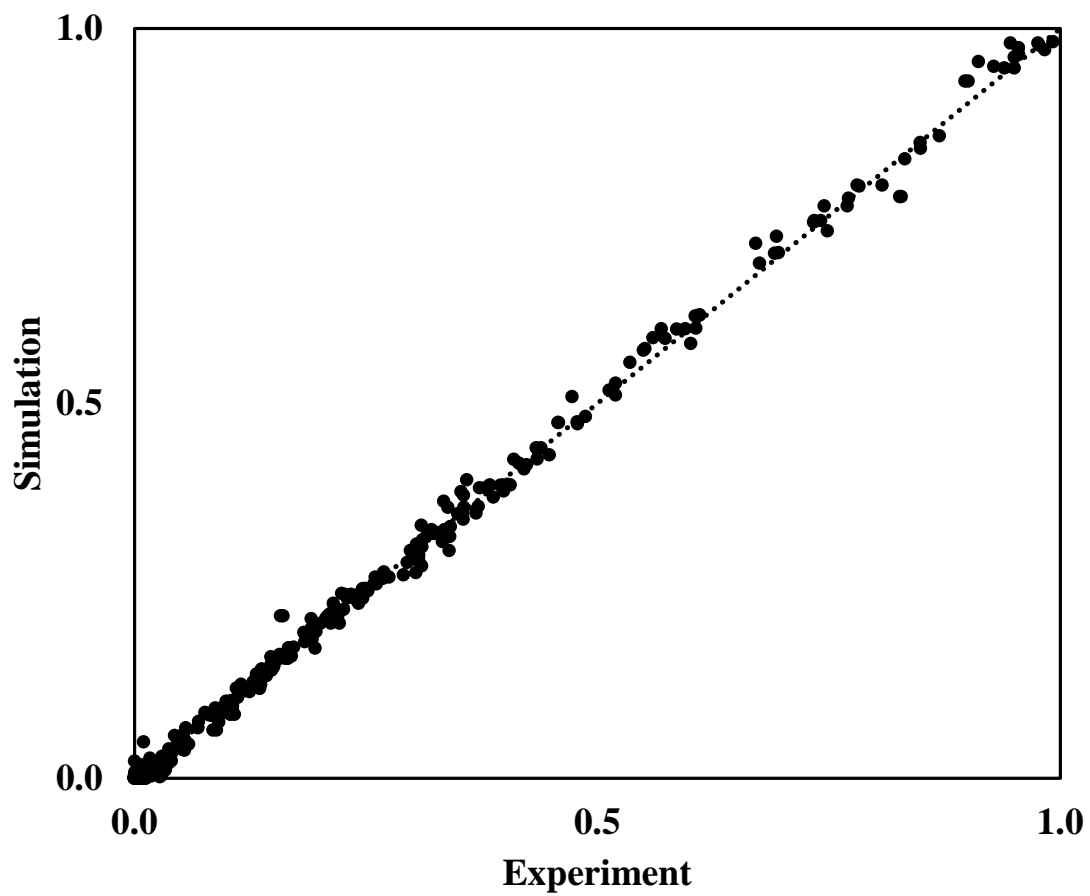

**Figure S4:** Comparison of computationally simulated and experimentally determined MIDs.

**Table S1: Mass isotopomer distribution (MID). The standard deviation based on the technical error of the instrument is 0.02.**

<sup>13</sup>C Vanillin\_Phenyl

| Amino Acid | TBDMS Fragment       | MID            |                |                |                |                |                |                |                |                |                |
|------------|----------------------|----------------|----------------|----------------|----------------|----------------|----------------|----------------|----------------|----------------|----------------|
|            |                      | M <sub>0</sub> | M <sub>1</sub> | M <sub>2</sub> | M <sub>3</sub> | M <sub>4</sub> | M <sub>5</sub> | M <sub>6</sub> | M <sub>7</sub> | M <sub>8</sub> | M <sub>9</sub> |
| Ala        | [M-57] <sup>+</sup>  | 0.11           | 0.01           | 0.14           | 0.74           |                |                |                |                |                |                |
|            | [M-159] <sup>+</sup> | 0.11           | 0.04           | 0.85           |                |                |                |                |                |                |                |
|            | f(302) <sup>+</sup>  | 0.41           | 0.03           | 0.56           |                |                |                |                |                |                |                |
| Gly        | [M-57] <sup>+</sup>  | 0.17           | 0.23           | 0.60           |                |                |                |                |                |                |                |
|            | [M-85] <sup>+</sup>  | 0.18           | 0.82           |                |                |                |                |                |                |                |                |
| Val        | [M-57] <sup>+</sup>  | 0.24           | 0.02           | 0.00           | 0.01           | 0.12           | 0.61           |                |                |                |                |
|            | [M-159] <sup>+</sup> | 0.24           | 0.01           | 0.01           | 0.05           | 0.69           |                |                |                |                |                |
|            | f(302) <sup>+</sup>  | 0.28           | 0.11           | 0.61           |                |                |                |                |                |                |                |
| Leu        | [M-15] <sup>+</sup>  | 0.22           | 0.01           | 0.04           | 0.00           | 0.04           | 0.09           | 0.60           |                |                |                |
|            | [M-159] <sup>+</sup> | 0.21           | 0.06           | 0.01           | 0.01           | 0.05           | 0.66           |                |                |                |                |
|            | f(302) <sup>+</sup>  | 0.64           | 0.04           | 0.32           |                |                |                |                |                |                |                |
| Ile        | [M-15] <sup>+</sup>  | 0.31           | 0.00           | 0.08           | 0.00           | 0.06           | 0.39           | 0.16           |                |                |                |
|            | [M-159] <sup>+</sup> | 0.31           | 0.02           | 0.07           | 0.01           | 0.13           | 0.46           |                |                |                |                |
|            | f(302) <sup>+</sup>  | 0.55           | 0.19           | 0.26           |                |                |                |                |                |                |                |
| Meth       | [M-57] <sup>+</sup>  | 0.23           | 0.02           | 0.02           | 0.55           | 0.17           | 0.01           |                |                |                |                |
|            | [M-159] <sup>+</sup> | 0.25           | 0.03           | 0.13           | 0.59           | 0.00           |                |                |                |                |                |
|            | f(302) <sup>+</sup>  | 0.31           | 0.48           | 0.21           |                |                |                |                |                |                |                |
| Pro        | [M-57] <sup>+</sup>  | 0.38           | 0.27           | 0.00           | 0.02           | 0.08           | 0.25           |                |                |                |                |
|            | [M-159] <sup>+</sup> | 0.27           | 0.01           | 0.02           | 0.04           | 0.66           |                |                |                |                |                |
|            | f(302) <sup>+</sup>  | 0.01           | 0.03           | 0.96           |                |                |                |                |                |                |                |
| Ser        | [M-57] <sup>+</sup>  | 0.13           | 0.12           | 0.44           | 0.31           |                |                |                |                |                |                |
|            | [M-159] <sup>+</sup> | 0.13           | 0.45           | 0.42           |                |                |                |                |                |                |                |
|            | f(302) <sup>+</sup>  | 0.14           | 0.21           | 0.65           |                |                |                |                |                |                |                |
| Thr        | [M-57] <sup>+</sup>  | 0.20           | 0.00           | 0.03           | 0.51           | 0.26           |                |                |                |                |                |
|            | [M-85] <sup>+</sup>  | 0.20           | 0.00           | 0.18           | 0.62           |                |                |                |                |                |                |
|            | f(302) <sup>+</sup>  | 0.13           | 0.30           | 0.57           |                |                |                |                |                |                |                |
| Phe        | [M-57] <sup>+</sup>  | 0.32           | 0.03           | 0.00           | 0.00           | 0.00           | 0.01           | 0.02           | 0.08           | 0.26           | 0.28           |
|            | [M-159] <sup>+</sup> | 0.31           | 0.03           | 0.00           | 0.00           | 0.00           | 0.01           | 0.06           | 0.23           | 0.36           |                |
|            | f(302) <sup>+</sup>  | 0.34           | 0.17           | 0.49           |                |                |                |                |                |                |                |
| Asp        | [M-57] <sup>+</sup>  | 0.05           | 0.00           | 0.04           | 0.59           | 0.32           |                |                |                |                |                |
|            | [M-159] <sup>+</sup> | 0.06           | 0.01           | 0.20           | 0.73           |                |                |                |                |                |                |
|            | f(302) <sup>+</sup>  | 0.07           | 0.43           | 0.50           |                |                |                |                |                |                |                |
| Glu        | [M-57] <sup>+</sup>  | 0.05           | 0.01           | 0.02           | 0.03           | 0.21           | 0.68           |                |                |                |                |
|            | [M-159] <sup>+</sup> | 0.05           | 0.01           | 0.03           | 0.06           | 0.85           |                |                |                |                |                |
|            | f(302) <sup>+</sup>  | 0.11           | 0.17           | 0.72           |                |                |                |                |                |                |                |
| Lys        | [M-57] <sup>+</sup>  | 0.33           | 0.00           | 0.00           | 0.02           | 0.03           | 0.29           | 0.30           |                |                |                |
|            | [M-159] <sup>+</sup> | 0.33           | 0.02           | 0.01           | 0.01           | 0.12           | 0.51           |                |                |                |                |
|            | f(302) <sup>+</sup>  | 0.33           | 0.14           | 0.53           |                |                |                |                |                |                |                |
| His        | [M-57] <sup>+</sup>  | 0.34           | 0.00           | 0.06           | 0.04           | 0.13           | 0.43           | 0.00           |                |                |                |
|            | [M-159] <sup>+</sup> | 0.38           | 0.02           | 0.02           | 0.17           | 0.37           | 0.04           |                |                |                |                |
|            | f(302) <sup>+</sup>  | 0.35           | 0.15           | 0.50           |                |                |                |                |                |                |                |
| Tyr        | [M-57] <sup>+</sup>  | 0.24           | 0.02           | 0.00           | 0.00           | 0.01           | 0.01           | 0.03           | 0.10           | 0.29           | 0.30           |
|            | [M-159] <sup>+</sup> | 0.23           | 0.02           | 0.01           | 0.00           | 0.01           | 0.02           | 0.08           | 0.27           | 0.36           |                |
|            | f(302) <sup>+</sup>  | 0.27           | 0.19           | 0.54           |                |                |                |                |                |                |                |

<sup>13</sup>C Vanillin\_Methoxy

| Amino Acid | TBDMS Fragment       | MID            |                |                |                |                |                |                |                |                |                |
|------------|----------------------|----------------|----------------|----------------|----------------|----------------|----------------|----------------|----------------|----------------|----------------|
|            |                      | M <sub>0</sub> | M <sub>1</sub> | M <sub>2</sub> | M <sub>3</sub> | M <sub>4</sub> | M <sub>5</sub> | M <sub>6</sub> | M <sub>7</sub> | M <sub>8</sub> | M <sub>9</sub> |
| Ala        | [M-57] <sup>+</sup>  | 0.96           | 0.04           | 0.00           | 0.00           |                |                |                |                |                |                |
|            | [M-159] <sup>+</sup> | 0.94           | 0.03           | 0.03           |                |                |                |                |                |                |                |
|            | f(302) <sup>+</sup>  | 0.96           | 0.04           | 0.00           |                |                |                |                |                |                |                |
| Gly        | [M-57] <sup>+</sup>  | 0.98           | 0.02           | 0.00           |                |                |                |                |                |                |                |
|            | [M-85] <sup>+</sup>  | 0.99           | 0.01           |                |                |                |                |                |                |                |                |
| Val        | [M-57] <sup>+</sup>  | 0.95           | 0.05           | 0.00           | 0.00           | 0.00           | 0.00           |                |                |                |                |
|            | [M-159] <sup>+</sup> | 0.95           | 0.05           | 0.00           | 0.00           | 0.00           |                |                |                |                |                |
|            | f(302) <sup>+</sup>  | 0.99           | 0.01           | 0.00           |                |                |                |                |                |                |                |
| Leu        | [M-15] <sup>+</sup>  | 0.91           | 0.05           | 0.02           | 0.01           | 0.00           | 0.00           | 0.00           |                |                |                |
|            | [M-159] <sup>+</sup> | 0.93           | 0.06           | 0.01           | 0.00           | 0.00           | 0.00           |                |                |                |                |
|            | f(302) <sup>+</sup>  | 0.98           | 0.02           | 0.00           |                |                |                |                |                |                |                |
| Ile        | [M-15] <sup>+</sup>  | 0.95           | 0.05           | 0.00           | 0.00           | 0.00           | 0.00           | 0.00           |                |                |                |
|            | [M-159] <sup>+</sup> | 0.94           | 0.05           | 0.01           | 0.00           | 0.00           | 0.00           |                |                |                |                |
|            | f(302) <sup>+</sup>  | 0.98           | 0.02           | 0.00           |                |                |                |                |                |                |                |
| Meth       | [M-57] <sup>+</sup>  | 0.12           | 0.84           | 0.04           | 0.00           | 0.00           | 0.00           |                |                |                |                |
|            | [M-159] <sup>+</sup> | 0.14           | 0.84           | 0.02           | 0.00           | 0.00           |                |                |                |                |                |
|            | f(302) <sup>+</sup>  | 0.62           | 0.33           | 0.05           |                |                |                |                |                |                |                |
| Pro        | [M-57] <sup>+</sup>  | 0.96           | 0.04           | 0.00           | 0.00           | 0.00           | 0.00           |                |                |                |                |
|            | [M-159] <sup>+</sup> | 0.96           | 0.04           | 0.00           | 0.00           | 0.00           |                |                |                |                |                |
|            | f(302) <sup>+</sup>  | 0.96           | 0.04           | 0.00           |                |                |                |                |                |                |                |
| Ser        | [M-57] <sup>+</sup>  | 0.47           | 0.52           | 0.01           | 0.00           |                |                |                |                |                |                |
|            | [M-159] <sup>+</sup> | 0.49           | 0.51           | 0.00           |                |                |                |                |                |                |                |
|            | f(302) <sup>+</sup>  | 0.98           | 0.02           | 0.00           |                |                |                |                |                |                |                |
| Thr        | [M-57] <sup>+</sup>  | 0.94           | 0.04           | 0.02           | 0.00           | 0.00           |                |                |                |                |                |
|            | [M-85] <sup>+</sup>  | 0.98           | 0.00           | 0.02           | 0.00           |                |                |                |                |                |                |
|            | f(302) <sup>+</sup>  | 0.41           | 0.58           | 0.01           |                |                |                |                |                |                |                |
| Phe        | [M-57] <sup>+</sup>  | 0.90           | 0.10           | 0.00           | 0.00           | 0.00           | 0.00           | 0.00           | 0.00           | 0.00           |                |
|            | [M-159] <sup>+</sup> | 0.93           | 0.07           | 0.00           | 0.00           | 0.00           | 0.00           | 0.00           | 0.00           | 0.00           |                |
|            | f(302) <sup>+</sup>  | 0.97           | 0.03           | 0.00           |                |                |                |                |                |                |                |
| Asp        | [M-57] <sup>+</sup>  | 0.98           | 0.02           | 0.00           | 0.00           | 0.00           |                |                |                |                |                |
|            | [M-159] <sup>+</sup> | 0.99           | 0.00           | 0.00           | 0.01           |                |                |                |                |                |                |
|            | f(302) <sup>+</sup>  | 0.97           | 0.03           | 0.00           |                |                |                |                |                |                |                |
| Glu        | [M-57] <sup>+</sup>  | 0.97           | 0.03           | 0.00           | 0.00           | 0.00           | 0.00           |                |                |                |                |
|            | [M-159] <sup>+</sup> | 0.98           | 0.02           | 0.00           | 0.00           | 0.00           |                |                |                |                |                |
|            | f(302) <sup>+</sup>  | 0.95           | 0.04           | 0.01           |                |                |                |                |                |                |                |
| Lys        | [M-57] <sup>+</sup>  | 0.95           | 0.05           | 0.00           | 0.00           | 0.00           | 0.00           | 0.00           |                |                |                |
|            | [M-159] <sup>+</sup> | 0.95           | 0.05           | 0.00           | 0.00           | 0.00           | 0.00           |                |                |                |                |
|            | f(302) <sup>+</sup>  | 0.99           | 0.01           | 0.00           |                |                |                |                |                |                |                |
| His        | [M-57] <sup>+</sup>  | 0.42           | 0.55           | 0.03           | 0.00           | 0.00           | 0.00           | 0.00           |                |                |                |
|            | [M-159] <sup>+</sup> | 0.43           | 0.52           | 0.03           | 0.01           | 0.01           | 0.00           |                |                |                |                |
|            | f(302) <sup>+</sup>  | 0.98           | 0.02           | 0.00           |                |                |                |                |                |                |                |
| Tyr        | [M-57] <sup>+</sup>  | 0.92           | 0.08           | 0.00           | 0.00           | 0.00           | 0.00           | 0.00           | 0.00           | 0.00           |                |
|            | [M-159] <sup>+</sup> | 0.91           | 0.08           | 0.01           | 0.00           | 0.00           | 0.00           | 0.00           | 0.00           | 0.00           |                |
|            | f(302) <sup>+</sup>  | 0.98           | 0.02           | 0.00           |                |                |                |                |                |                |                |

<sup>13</sup>C Vanillin\_Aldehyde

| Amino Acid | TBDMS Fragment       | MID            |                |                |                |                |                |                |                |                |                |
|------------|----------------------|----------------|----------------|----------------|----------------|----------------|----------------|----------------|----------------|----------------|----------------|
|            |                      | M <sub>0</sub> | M <sub>1</sub> | M <sub>2</sub> | M <sub>3</sub> | M <sub>4</sub> | M <sub>5</sub> | M <sub>6</sub> | M <sub>7</sub> | M <sub>8</sub> | M <sub>9</sub> |
| Ala        | [M-57] <sup>+</sup>  | 0.87           | 0.14           | 0.00           | 0.00           |                |                |                |                |                |                |
|            | [M-159] <sup>+</sup> | 0.94           | 0.03           | 0.03           |                |                |                |                |                |                |                |
|            | f(302) <sup>+</sup>  | 0.86           | 0.14           | 0.00           |                |                |                |                |                |                |                |
| Gly        | [M-57] <sup>+</sup>  | 0.80           | 0.20           | 0.00           |                |                |                |                |                |                |                |
|            | [M-85] <sup>+</sup>  | 0.99           | 0.01           |                |                |                |                |                |                |                |                |
| Val        | [M-57] <sup>+</sup>  | 0.86           | 0.13           | 0.01           | 0.00           | 0.00           | 0.00           |                |                |                |                |
|            | [M-159] <sup>+</sup> | 0.95           | 0.04           | 0.00           | 0.01           | 0.00           |                |                |                |                |                |
|            | f(302) <sup>+</sup>  | 0.90           | 0.09           | 0.01           |                |                |                |                |                |                |                |
| Leu        | [M-15] <sup>+</sup>  | 0.92           | 0.05           | 0.01           | 0.02           | 0.00           | 0.00           | 0.00           |                |                |                |
|            | [M-159] <sup>+</sup> | 0.94           | 0.05           | 0.01           | 0.00           | 0.00           | 0.00           |                |                |                |                |
|            | f(302) <sup>+</sup>  | 0.98           | 0.02           | 0.00           |                |                |                |                |                |                |                |
| Ile        | [M-15] <sup>+</sup>  | 0.59           | 0.40           | 0.01           | 0.00           | 0.00           | 0.00           | 0.00           |                |                |                |
|            | [M-159] <sup>+</sup> | 0.84           | 0.15           | 0.01           | 0.00           | 0.00           | 0.00           |                |                |                |                |
|            | f(302) <sup>+</sup>  | 0.63           | 0.37           | 0.00           |                |                |                |                |                |                |                |
| Meth       | [M-57] <sup>+</sup>  | 0.51           | 0.48           | 0.01           | 0.00           | 0.00           | 0.00           |                |                |                |                |
|            | [M-159] <sup>+</sup> | 0.83           | 0.17           | 0.00           | 0.00           | 0.00           |                |                |                |                |                |
|            | f(302) <sup>+</sup>  | 0.36           | 0.48           | 0.16           |                |                |                |                |                |                |                |
| Pro        | [M-57] <sup>+</sup>  | 0.74           | 0.04           | 0.04           | 0.07           | 0.05           | 0.06           |                |                |                |                |
|            | [M-159] <sup>+</sup> | 0.84           | 0.05           | 0.05           | 0.03           | 0.03           |                |                |                |                |                |
|            | f(302) <sup>+</sup>  | 0.97           | 0.00           | 0.03           |                |                |                |                |                |                |                |
| Ser        | [M-57] <sup>+</sup>  | 0.79           | 0.21           | 0.00           | 0.00           |                |                |                |                |                |                |
|            | [M-159] <sup>+</sup> | 0.99           | 0.01           | 0.00           |                |                |                |                |                |                |                |
|            | f(302) <sup>+</sup>  | 0.81           | 0.18           | 0.01           |                |                |                |                |                |                |                |
| Thr        | [M-57] <sup>+</sup>  | 0.46           | 0.53           | 0.00           | 0.01           | 0.00           |                |                |                |                |                |
|            | [M-85] <sup>+</sup>  | 0.83           | 0.15           | 0.02           | 0.00           |                |                |                |                |                |                |
|            | f(302) <sup>+</sup>  | 0.34           | 0.43           | 0.23           |                |                |                |                |                |                |                |
| Phe        | [M-57] <sup>+</sup>  | 0.63           | 0.27           | 0.09           | 0.01           | 0.00           | 0.00           | 0.00           | 0.00           | 0.00           |                |
|            | [M-159] <sup>+</sup> | 0.72           | 0.24           | 0.04           | 0.00           | 0.00           | 0.00           | 0.00           | 0.00           | 0.00           |                |
|            | f(302) <sup>+</sup>  | 0.85           | 0.15           | 0.00           |                |                |                |                |                |                |                |
| Asp        | [M-57] <sup>+</sup>  | 0.45           | 0.55           | 0.00           | 0.00           | 0.00           |                |                |                |                |                |
|            | [M-159] <sup>+</sup> | 0.84           | 0.16           | 0.00           | 0.00           |                |                |                |                |                |                |
|            | f(302) <sup>+</sup>  | 0.60           | 0.40           | 0.00           |                |                |                |                |                |                |                |
| Glu        | [M-57] <sup>+</sup>  | 0.82           | 0.18           | 0.00           | 0.00           | 0.00           | 0.00           |                |                |                |                |
|            | [M-159] <sup>+</sup> | 0.97           | 0.03           | 0.00           | 0.00           | 0.00           |                |                |                |                |                |
|            | f(302) <sup>+</sup>  | 0.79           | 0.19           | 0.02           |                |                |                |                |                |                |                |
| Lys        | [M-57] <sup>+</sup>  | 0.68           | 0.29           | 0.03           | 0.00           | 0.00           | 0.00           | 0.00           |                |                |                |
|            | [M-159] <sup>+</sup> | 0.87           | 0.13           | 0.00           | 0.00           | 0.00           | 0.00           |                |                |                |                |
|            | f(302) <sup>+</sup>  | 0.90           | 0.10           | 0.00           |                |                |                |                |                |                |                |
| His        | [M-57] <sup>+</sup>  | 0.78           | 0.21           | 0.01           | 0.00           | 0.00           | 0.00           | 0.00           |                |                |                |
|            | [M-159] <sup>+</sup> | 0.81           | 0.14           | 0.03           | 0.02           | 0.00           | 0.00           |                |                |                |                |
|            | f(302) <sup>+</sup>  | 0.98           | 0.02           | 0.00           |                |                |                |                |                |                |                |
| Tyr        | [M-57] <sup>+</sup>  | 0.60           | 0.31           | 0.07           | 0.02           | 0.00           | 0.00           | 0.00           | 0.00           | 0.00           |                |
|            | [M-159] <sup>+</sup> | 0.65           | 0.30           | 0.04           | 0.01           | 0.00           | 0.00           | 0.00           | 0.00           | 0.00           |                |
|            | f(302) <sup>+</sup>  | 0.83           | 0.17           | 0.00           |                |                |                |                |                |                |                |



<sup>13</sup>C Acetate 1

| Amino Acid | TBDMS Fragment       | MID            |                |                |                |                |                |                |                |                |                |
|------------|----------------------|----------------|----------------|----------------|----------------|----------------|----------------|----------------|----------------|----------------|----------------|
|            |                      | M <sub>0</sub> | M <sub>1</sub> | M <sub>2</sub> | M <sub>3</sub> | M <sub>4</sub> | M <sub>5</sub> | M <sub>6</sub> | M <sub>7</sub> | M <sub>8</sub> | M <sub>9</sub> |
| Ala        | [M-57] <sup>+</sup>  | 0.87           | 0.13           | 0.00           | 0.00           |                |                |                |                |                |                |
|            | [M-159] <sup>+</sup> | 0.94           | 0.03           | 0.03           |                |                |                |                |                |                |                |
|            | f(302) <sup>+</sup>  | 0.85           | 0.14           | 0.01           |                |                |                |                |                |                |                |
| Gly        | [M-57] <sup>+</sup>  | 0.85           | 0.15           | 0.00           |                |                |                |                |                |                |                |
|            | [M-85] <sup>+</sup>  | 0.99           | 0.01           |                |                |                |                |                |                |                |                |
| Val        | [M-57] <sup>+</sup>  | 0.96           | 0.04           | 0.00           | 0.00           | 0.00           | 0.00           |                |                |                |                |
|            | [M-159] <sup>+</sup> | 0.96           | 0.04           | 0.00           | 0.00           | 0.00           |                |                |                |                |                |
|            | f(302) <sup>+</sup>  | 0.99           | 0.01           | 0.00           |                |                |                |                |                |                |                |
| Leu        | [M-15] <sup>+</sup>  | 0.65           | 0.19           | 0.06           | 0.10           | 0.00           | 0.00           | 0.00           |                |                |                |
|            | [M-159] <sup>+</sup> | 0.94           | 0.05           | 0.01           | 0.00           | 0.00           | 0.00           |                |                |                |                |
|            | f(302) <sup>+</sup>  | 0.80           | 0.20           | 0.00           |                |                |                |                |                |                |                |
| Ile        | [M-15] <sup>+</sup>  | 0.75           | 0.19           | 0.00           | 0.06           | 0.00           | 0.00           | 0.00           |                |                |                |
|            | [M-159] <sup>+</sup> | 0.91           | 0.08           | 0.01           | 0.00           | 0.00           | 0.00           |                |                |                |                |
|            | f(302) <sup>+</sup>  | 0.95           | 0.04           | 0.01           |                |                |                |                |                |                |                |
| Meth       | [M-57] <sup>+</sup>  | 0.97           | 0.04           | 0.00           | 0.00           | 0.00           | 0.00           |                |                |                |                |
|            | [M-159] <sup>+</sup> | 0.95           | 0.05           | 0.00           | 0.00           | 0.00           |                |                |                |                |                |
|            | f(302) <sup>+</sup>  | 0.74           | 0.26           | 0.00           |                |                |                |                |                |                |                |
| Pro        | [M-57] <sup>+</sup>  | 0.79           | 0.13           | 0.06           | 0.01           | 0.01           | 0.00           |                |                |                |                |
|            | [M-159] <sup>+</sup> | 0.81           | 0.19           | 0.00           | 0.00           | 0.00           |                |                |                |                |                |
|            | f(302) <sup>+</sup>  | 0.98           | 0.02           | 0.00           |                |                |                |                |                |                |                |
| Ser        | [M-57] <sup>+</sup>  | 0.83           | 0.17           | 0.00           | 0.00           |                |                |                |                |                |                |
|            | [M-159] <sup>+</sup> | 0.99           | 0.01           | 0.00           |                |                |                |                |                |                |                |
|            | f(302) <sup>+</sup>  | 0.85           | 0.15           | 0.00           |                |                |                |                |                |                |                |
| Thr        | [M-57] <sup>+</sup>  | 0.64           | 0.29           | 0.06           | 0.01           | 0.00           |                |                |                |                |                |
|            | [M-85] <sup>+</sup>  | 0.78           | 0.19           | 0.02           | 0.00           |                |                |                |                |                |                |
|            | f(302) <sup>+</sup>  | 0.34           | 0.54           | 0.12           |                |                |                |                |                |                |                |
| Phe        | [M-57] <sup>+</sup>  | 0.92           | 0.07           | 0.01           | 0.00           | 0.00           | 0.00           | 0.00           | 0.00           | 0.00           |                |
|            | [M-159] <sup>+</sup> | 0.92           | 0.08           | 0.00           | 0.00           | 0.00           | 0.00           | 0.00           | 0.00           | 0.00           |                |
|            | f(302) <sup>+</sup>  | 0.98           | 0.02           | 0.00           |                |                |                |                |                |                |                |
| Asp        | [M-57] <sup>+</sup>  | 0.51           | 0.47           | 0.02           | 0.00           | 0.00           |                |                |                |                |                |
|            | [M-159] <sup>+</sup> | 0.74           | 0.25           | 0.01           | 0.00           |                |                |                |                |                |                |
|            | f(302) <sup>+</sup>  | 0.75           | 0.25           | 0.00           |                |                |                |                |                |                |                |
| Glu        | [M-57] <sup>+</sup>  | 0.42           | 0.36           | 0.22           | 0.00           | 0.00           | 0.00           |                |                |                |                |
|            | [M-159] <sup>+</sup> | 0.44           | 0.55           | 0.01           | 0.00           | 0.00           |                |                |                |                |                |
|            | f(302) <sup>+</sup>  | 0.75           | 0.25           | 0.00           |                |                |                |                |                |                |                |
| Lys        | [M-57] <sup>+</sup>  | 0.90           | 0.06           | 0.02           | 0.02           | 0.00           | 0.00           | 0.00           |                |                |                |
|            | [M-159] <sup>+</sup> | 0.94           | 0.04           | 0.02           | 0.00           | 0.00           | 0.00           |                |                |                |                |
|            | f(302) <sup>+</sup>  | 0.97           | 0.03           | 0.00           |                |                |                |                |                |                |                |
| His        | [M-57] <sup>+</sup>  | 0.93           | 0.07           | 0.00           | 0.00           | 0.00           | 0.00           | 0.00           |                |                |                |
|            | [M-159] <sup>+</sup> | 0.94           | 0.05           | 0.00           | 0.01           | 0.00           | 0.00           |                |                |                |                |
|            | f(302) <sup>+</sup>  | 0.98           | 0.02           | 0.00           |                |                |                |                |                |                |                |
| Tyr        | [M-57] <sup>+</sup>  | 0.92           | 0.06           | 0.01           | 0.01           | 0.00           | 0.00           | 0.00           | 0.00           | 0.00           |                |
|            | [M-159] <sup>+</sup> | 0.91           | 0.09           | 0.00           | 0.00           | 0.00           | 0.00           | 0.00           | 0.00           | 0.00           |                |
|            | f(302) <sup>+</sup>  | 0.96           | 0.04           | 0.00           |                |                |                |                |                |                |                |

<sup>13</sup>C Acetate 1,2

| Amino Acid | TBDMS Fragment       | MID            |                |                |                |                |                |                |                |                |                |
|------------|----------------------|----------------|----------------|----------------|----------------|----------------|----------------|----------------|----------------|----------------|----------------|
|            |                      | M <sub>0</sub> | M <sub>1</sub> | M <sub>2</sub> | M <sub>3</sub> | M <sub>4</sub> | M <sub>5</sub> | M <sub>6</sub> | M <sub>7</sub> | M <sub>8</sub> | M <sub>9</sub> |
| Ala        | [M-57] <sup>+</sup>  | 0.73           | 0.06           | 0.05           | 0.16           |                |                |                |                |                |                |
|            | [M-159] <sup>+</sup> | 0.73           | 0.08           | 0.19           |                |                |                |                |                |                |                |
|            | f(302) <sup>+</sup>  | 0.86           | 0.09           | 0.05           |                |                |                |                |                |                |                |
| Gly        | [M-57] <sup>+</sup>  | 0.70           | 0.06           | 0.24           |                |                |                |                |                |                |                |
|            | [M-85] <sup>+</sup>  | 0.78           | 0.22           |                |                |                |                |                |                |                |                |
| Val        | [M-57] <sup>+</sup>  | 0.93           | 0.04           | 0.01           | 0.00           | 0.00           | 0.02           |                |                |                |                |
|            | [M-159] <sup>+</sup> | 0.94           | 0.03           | 0.01           | 0.01           | 0.01           |                |                |                |                |                |
|            | f(302) <sup>+</sup>  | 0.96           | 0.03           | 0.01           |                |                |                |                |                |                |                |
| Leu        | [M-15] <sup>+</sup>  | 0.65           | 0.08           | 0.20           | 0.07           | 0.00           | 0.00           | 0.00           |                |                |                |
|            | [M-159] <sup>+</sup> | 0.74           | 0.23           | 0.01           | 0.00           | 0.01           | 0.01           |                |                |                |                |
|            | f(302) <sup>+</sup>  | 0.79           | 0.03           | 0.18           |                |                |                |                |                |                |                |
| Ile        | [M-15] <sup>+</sup>  | 0.87           | 0.07           | 0.03           | 0.00           | 0.03           | 0.00           | 0.00           |                |                |                |
|            | [M-159] <sup>+</sup> | 0.86           | 0.05           | 0.02           | 0.01           | 0.03           | 0.03           |                |                |                |                |
|            | f(302) <sup>+</sup>  | 0.96           | 0.00           | 0.04           |                |                |                |                |                |                |                |
| Meth       | [M-57] <sup>+</sup>  | 0.94           | 0.06           | 0.00           | 0.00           | 0.00           | 0.00           |                |                |                |                |
|            | [M-159] <sup>+</sup> | 0.97           | 0.03           | 0.00           | 0.00           | 0.00           |                |                |                |                |                |
|            | f(302) <sup>+</sup>  | 0.43           | 0.44           | 0.13           |                |                |                |                |                |                |                |
| Pro        | [M-57] <sup>+</sup>  | 0.79           | 0.03           | 0.01           | 0.03           | 0.04           | 0.10           |                |                |                |                |
|            | [M-159] <sup>+</sup> | 0.80           | 0.03           | 0.01           | 0.02           | 0.14           |                |                |                |                |                |
|            | f(302) <sup>+</sup>  | 0.60           | 0.00           | 0.40           |                |                |                |                |                |                |                |
| Ser        | [M-57] <sup>+</sup>  | 0.67           | 0.04           | 0.06           | 0.23           |                |                |                |                |                |                |
|            | [M-159] <sup>+</sup> | 0.64           | 0.13           | 0.23           |                |                |                |                |                |                |                |
|            | f(302) <sup>+</sup>  | 0.68           | 0.08           | 0.24           |                |                |                |                |                |                |                |
| Thr        | [M-57] <sup>+</sup>  | 0.57           | 0.03           | 0.06           | 0.11           | 0.24           |                |                |                |                |                |
|            | [M-85] <sup>+</sup>  | 0.68           | 0.07           | 0.00           | 0.25           |                |                |                |                |                |                |
|            | f(302) <sup>+</sup>  | 0.33           | 0.57           | 0.10           |                |                |                |                |                |                |                |
| Phe        | [M-57] <sup>+</sup>  | 0.91           | 0.06           | 0.01           | 0.00           | 0.00           | 0.00           | 0.00           | 0.01           | 0.01           | 0.00           |
|            | [M-159] <sup>+</sup> | 0.91           | 0.07           | 0.00           | 0.00           | 0.00           | 0.00           | 0.00           | 0.01           | 0.01           |                |
|            | f(302) <sup>+</sup>  | 0.97           | 0.01           | 0.02           |                |                |                |                |                |                |                |
| Asp        | [M-57] <sup>+</sup>  | 0.44           | 0.07           | 0.11           | 0.13           | 0.25           |                |                |                |                |                |
|            | [M-159] <sup>+</sup> | 0.43           | 0.10           | 0.17           | 0.30           |                |                |                |                |                |                |
|            | f(302) <sup>+</sup>  | 0.52           | 0.10           | 0.38           |                |                |                |                |                |                |                |
| Glu        | [M-57] <sup>+</sup>  | 0.34           | 0.03           | 0.11           | 0.08           | 0.12           | 0.32           |                |                |                |                |
|            | [M-159] <sup>+</sup> | 0.35           | 0.06           | 0.12           | 0.12           | 0.35           |                |                |                |                |                |
|            | f(302) <sup>+</sup>  | 0.45           | 0.21           | 0.34           |                |                |                |                |                |                |                |
| Lys        | [M-57] <sup>+</sup>  | 0.92           | 0.06           | 0.00           | 0.01           | 0.00           | 0.00           | 0.01           |                |                |                |
|            | [M-159] <sup>+</sup> | 0.83           | 0.09           | 0.00           | 0.00           | 0.03           | 0.05           |                |                |                |                |
|            | f(302) <sup>+</sup>  | 0.76           | 0.15           | 0.09           |                |                |                |                |                |                |                |
| His        | [M-57] <sup>+</sup>  | 0.97           | 0.02           | 0.01           | 0.00           | 0.00           | 0.00           | 0.00           |                |                |                |
|            | [M-159] <sup>+</sup> | 0.97           | 0.02           | 0.01           | 0.01           | 0.00           | 0.00           |                |                |                |                |
|            | f(302) <sup>+</sup>  | 0.93           | 0.00           | 0.07           |                |                |                |                |                |                |                |
| Tyr        | [M-57] <sup>+</sup>  | 0.87           | 0.06           | 0.03           | 0.00           | 0.00           | 0.01           | 0.00           | 0.00           | 0.00           | 0.03           |
|            | [M-159] <sup>+</sup> | 0.89           | 0.05           | 0.02           | 0.00           | 0.00           | 0.00           | 0.00           | 0.00           | 0.04           |                |
|            | f(302) <sup>+</sup>  | 0.94           | 0.02           | 0.04           |                |                |                |                |                |                |                |

<sup>13</sup>C Glucose\_1,2

| Amino Acid | TBDMS Fragment       | MID            |                |                |                |                |                |                |                |                |                |
|------------|----------------------|----------------|----------------|----------------|----------------|----------------|----------------|----------------|----------------|----------------|----------------|
|            |                      | M <sub>0</sub> | M <sub>1</sub> | M <sub>2</sub> | M <sub>3</sub> | M <sub>4</sub> | M <sub>5</sub> | M <sub>6</sub> | M <sub>7</sub> | M <sub>8</sub> | M <sub>9</sub> |
| Ala        | [M-57] <sup>+</sup>  | 0.96           | 0.03           | 0.00           | 0.01           |                |                |                |                |                |                |
|            | [M-159] <sup>+</sup> | 0.94           | 0.03           | 0.03           |                |                |                |                |                |                |                |
|            | f(302) <sup>+</sup>  | 0.98           | 0.01           | 0.01           |                |                |                |                |                |                |                |
| Gly        | [M-57] <sup>+</sup>  | 0.98           | 0.01           | 0.01           |                |                |                |                |                |                |                |
|            | [M-85] <sup>+</sup>  | 0.99           | 0.01           |                |                |                |                |                |                |                |                |
| Val        | [M-57] <sup>+</sup>  | 0.95           | 0.05           | 0.00           | 0.00           | 0.00           | 0.00           |                |                |                |                |
|            | [M-159] <sup>+</sup> | 0.95           | 0.04           | 0.00           | 0.01           | 0.00           |                |                |                |                |                |
|            | f(302) <sup>+</sup>  | 0.99           | 0.01           | 0.00           |                |                |                |                |                |                |                |
| Leu        | [M-15] <sup>+</sup>  | 0.85           | 0.09           | 0.02           | 0.02           | 0.01           | 0.01           | 0.00           |                |                |                |
|            | [M-159] <sup>+</sup> | 0.94           | 0.05           | 0.01           | 0.00           | 0.00           | 0.00           |                |                |                |                |
|            | f(302) <sup>+</sup>  | 0.97           | 0.03           | 0.00           |                |                |                |                |                |                |                |
| Ile        | [M-15] <sup>+</sup>  | 0.93           | 0.05           | 0.02           | 0.00           | 0.00           | 0.00           | 0.00           |                |                |                |
|            | [M-159] <sup>+</sup> | 0.94           | 0.06           | 0.00           | 0.00           | 0.00           | 0.00           |                |                |                |                |
|            | f(302) <sup>+</sup>  | 0.98           | 0.02           | 0.00           |                |                |                |                |                |                |                |
| Meth       | [M-57] <sup>+</sup>  | 0.96           | 0.04           | 0.00           | 0.00           | 0.00           | 0.00           |                |                |                |                |
|            | [M-159] <sup>+</sup> | 0.96           | 0.04           | 0.00           | 0.00           | 0.00           |                |                |                |                |                |
|            | f(302) <sup>+</sup>  | 0.49           | 0.51           | 0.00           |                |                |                |                |                |                |                |
| Pro        | [M-57] <sup>+</sup>  | 0.96           | 0.03           | 0.00           | 0.01           | 0.00           | 0.00           |                |                |                |                |
|            | [M-159] <sup>+</sup> | 0.96           | 0.04           | 0.00           | 0.00           | 0.00           |                |                |                |                |                |
|            | f(302) <sup>+</sup>  | 0.72           | 0.11           | 0.17           |                |                |                |                |                |                |                |
| Ser        | [M-57] <sup>+</sup>  | 0.98           | 0.02           | 0.00           | 0.00           |                |                |                |                |                |                |
|            | [M-159] <sup>+</sup> | 0.98           | 0.01           | 0.01           |                |                |                |                |                |                |                |
|            | f(302) <sup>+</sup>  | 0.99           | 0.01           | 0.00           |                |                |                |                |                |                |                |
| Thr        | [M-57] <sup>+</sup>  | 0.98           | 0.02           | 0.00           | 0.00           | 0.00           |                |                |                |                |                |
|            | [M-85] <sup>+</sup>  | 0.96           | 0.04           | 0.00           | 0.00           |                |                |                |                |                |                |
|            | f(302) <sup>+</sup>  | 0.40           | 0.60           | 0.00           |                |                |                |                |                |                |                |
| Phe        | [M-57] <sup>+</sup>  | 0.90           | 0.09           | 0.00           | 0.01           | 0.00           | 0.00           | 0.00           | 0.00           | 0.00           |                |
|            | [M-159] <sup>+</sup> | 0.89           | 0.09           | 0.01           | 0.01           | 0.00           | 0.00           | 0.00           | 0.00           | 0.00           |                |
|            | f(302) <sup>+</sup>  | 0.98           | 0.02           | 0.00           |                |                |                |                |                |                |                |
| Asp        | [M-57] <sup>+</sup>  | 0.98           | 0.02           | 0.00           | 0.00           | 0.00           |                |                |                |                |                |
|            | [M-159] <sup>+</sup> | 0.98           | 0.01           | 0.00           | 0.01           |                |                |                |                |                |                |
|            | f(302) <sup>+</sup>  | 0.97           | 0.02           | 0.01           |                |                |                |                |                |                |                |
| Glu        | [M-57] <sup>+</sup>  | 0.96           | 0.04           | 0.00           | 0.00           | 0.00           | 0.00           |                |                |                |                |
|            | [M-159] <sup>+</sup> | 0.96           | 0.04           | 0.00           | 0.00           | 0.00           |                |                |                |                |                |
|            | f(302) <sup>+</sup>  | 0.94           | 0.06           | 0.00           |                |                |                |                |                |                |                |
| Lys        | [M-57] <sup>+</sup>  | 0.94           | 0.06           | 0.00           | 0.00           | 0.00           | 0.00           | 0.00           |                |                |                |
|            | [M-159] <sup>+</sup> | 0.97           | 0.03           | 0.00           | 0.00           | 0.00           | 0.00           |                |                |                |                |
|            | f(302) <sup>+</sup>  | 0.98           | 0.02           | 0.00           |                |                |                |                |                |                |                |
| His        | [M-57] <sup>+</sup>  | 0.94           | 0.05           | 0.00           | 0.01           | 0.00           | 0.00           | 0.00           |                |                |                |
|            | [M-159] <sup>+</sup> | 0.93           | 0.04           | 0.00           | 0.02           | 0.01           | 0.00           |                |                |                |                |
|            | f(302) <sup>+</sup>  | 0.97           | 0.03           | 0.00           |                |                |                |                |                |                |                |
| Tyr        | [M-57] <sup>+</sup>  | 0.90           | 0.09           | 0.00           | 0.00           | 0.01           | 0.00           | 0.00           | 0.00           | 0.00           |                |
|            | [M-159] <sup>+</sup> | 0.87           | 0.12           | 0.00           | 0.00           | 0.01           | 0.00           | 0.00           | 0.00           | 0.00           |                |
|            | f(302) <sup>+</sup>  | 0.99           | 0.01           | 0.00           |                |                |                |                |                |                |                |

<sup>13</sup>C Xylose\_1,2

| Amino Acid | TBDMS Fragment       | MID            |                |                |                |                |                |                |                |                |                |
|------------|----------------------|----------------|----------------|----------------|----------------|----------------|----------------|----------------|----------------|----------------|----------------|
|            |                      | M <sub>0</sub> | M <sub>1</sub> | M <sub>2</sub> | M <sub>3</sub> | M <sub>4</sub> | M <sub>5</sub> | M <sub>6</sub> | M <sub>7</sub> | M <sub>8</sub> | M <sub>9</sub> |
| Ala        | [M-57] <sup>+</sup>  | 0.98           | 0.02           | 0.00           | 0.00           |                |                |                |                |                |                |
|            | [M-159] <sup>+</sup> | 0.95           | 0.02           | 0.03           |                |                |                |                |                |                |                |
|            | f(302) <sup>+</sup>  | 0.98           | 0.00           | 0.02           |                |                |                |                |                |                |                |
| Gly        | [M-57] <sup>+</sup>  | 0.98           | 0.02           | 0.00           |                |                |                |                |                |                |                |
|            | [M-85] <sup>+</sup>  | 0.99           | 0.01           |                |                |                |                |                |                |                |                |
| Val        | [M-57] <sup>+</sup>  | 0.95           | 0.05           | 0.00           | 0.00           | 0.00           | 0.00           |                |                |                |                |
|            | [M-159] <sup>+</sup> | 0.96           | 0.03           | 0.00           | 0.01           | 0.00           |                |                |                |                |                |
|            | f(302) <sup>+</sup>  | 0.98           | 0.02           | 0.00           |                |                |                |                |                |                |                |
| Leu        | [M-15] <sup>+</sup>  | 0.88           | 0.07           | 0.00           | 0.04           | 0.00           | 0.01           | 0.00           |                |                |                |
|            | [M-159] <sup>+</sup> | 0.94           | 0.05           | 0.01           | 0.00           | 0.00           | 0.00           |                |                |                |                |
|            | f(302) <sup>+</sup>  | 0.98           | 0.02           | 0.00           |                |                |                |                |                |                |                |
| Ile        | [M-15] <sup>+</sup>  | 0.80           | 0.18           | 0.00           | 0.02           | 0.00           | 0.00           | 0.00           |                |                |                |
|            | [M-159] <sup>+</sup> | 0.96           | 0.04           | 0.00           | 0.00           | 0.00           | 0.00           |                |                |                |                |
|            | f(302) <sup>+</sup>  | 0.99           | 0.00           | 0.01           |                |                |                |                |                |                |                |
| Meth       | [M-57] <sup>+</sup>  | 0.97           | 0.03           | 0.00           | 0.00           | 0.00           | 0.00           |                |                |                |                |
|            | [M-159] <sup>+</sup> | 0.97           | 0.02           | 0.01           | 0.00           | 0.00           |                |                |                |                |                |
|            | f(302) <sup>+</sup>  | 0.50           | 0.50           | 0.00           |                |                |                |                |                |                |                |
| Pro        | [M-57] <sup>+</sup>  | 0.96           | 0.04           | 0.00           | 0.00           | 0.00           | 0.00           |                |                |                |                |
|            | [M-159] <sup>+</sup> | 0.97           | 0.03           | 0.00           | 0.00           | 0.00           |                |                |                |                |                |
|            | f(302) <sup>+</sup>  | 1.00           | 0.00           | 0.00           |                |                |                |                |                |                |                |
| Ser        | [M-57] <sup>+</sup>  | 0.97           | 0.03           | 0.00           | 0.00           |                |                |                |                |                |                |
|            | [M-159] <sup>+</sup> | 0.99           | 0.01           | 0.00           |                |                |                |                |                |                |                |
|            | f(302) <sup>+</sup>  | 0.99           | 0.01           | 0.00           |                |                |                |                |                |                |                |
| Thr        | [M-57] <sup>+</sup>  | 0.97           | 0.03           | 0.00           | 0.00           | 0.00           |                |                |                |                |                |
|            | [M-85] <sup>+</sup>  | 0.99           | 0.01           | 0.00           | 0.00           |                |                |                |                |                |                |
|            | f(302) <sup>+</sup>  | 0.43           | 0.54           | 0.03           |                |                |                |                |                |                |                |
| Phe        | [M-57] <sup>+</sup>  | 0.93           | 0.07           | 0.00           | 0.00           | 0.00           | 0.00           | 0.00           | 0.00           | 0.00           |                |
|            | [M-159] <sup>+</sup> | 0.92           | 0.07           | 0.01           | 0.00           | 0.00           | 0.00           | 0.00           | 0.00           | 0.00           |                |
|            | f(302) <sup>+</sup>  | 0.99           | 0.01           | 0.00           |                |                |                |                |                |                |                |
| Asp        | [M-57] <sup>+</sup>  | 0.98           | 0.02           | 0.00           | 0.00           | 0.00           |                |                |                |                |                |
|            | [M-159] <sup>+</sup> | 0.98           | 0.01           | 0.00           | 0.01           |                |                |                |                |                |                |
|            | f(302) <sup>+</sup>  | 0.99           | 0.01           | 0.00           |                |                |                |                |                |                |                |
| Glu        | [M-57] <sup>+</sup>  | 0.97           | 0.03           | 0.00           | 0.00           | 0.00           | 0.00           |                |                |                |                |
|            | [M-159] <sup>+</sup> | 0.98           | 0.02           | 0.00           | 0.00           | 0.00           |                |                |                |                |                |
|            | f(302) <sup>+</sup>  | 0.94           | 0.03           | 0.03           |                |                |                |                |                |                |                |
| Lys        | [M-57] <sup>+</sup>  | 0.95           | 0.05           | 0.00           | 0.00           | 0.00           | 0.00           | 0.00           |                |                |                |
|            | [M-159] <sup>+</sup> | 0.94           | 0.06           | 0.00           | 0.00           | 0.00           | 0.00           |                |                |                |                |
|            | f(302) <sup>+</sup>  | 0.96           | 0.04           | 0.00           |                |                |                |                |                |                |                |
| His        | [M-57] <sup>+</sup>  | 0.96           | 0.04           | 0.00           | 0.00           | 0.00           | 0.00           | 0.00           |                |                |                |
|            | [M-159] <sup>+</sup> | 0.95           | 0.05           | 0.00           | 0.00           | 0.00           | 0.00           |                |                |                |                |
|            | f(302) <sup>+</sup>  | 0.96           | 0.04           | 0.00           |                |                |                |                |                |                |                |
| Tyr        | [M-57] <sup>+</sup>  | 0.94           | 0.05           | 0.00           | 0.01           | 0.00           | 0.00           | 0.00           | 0.00           | 0.00           |                |
|            | [M-159] <sup>+</sup> | 0.92           | 0.06           | 0.02           | 0.00           | 0.00           | 0.00           | 0.00           | 0.00           | 0.00           |                |
|            | f(302) <sup>+</sup>  | 0.99           | 0.01           | 0.00           |                |                |                |                |                |                |                |

<sup>13</sup>C Pyruvate+Malate

| Amino Acid | TBDMS Fragment       | MID            |                |                |                |                |                |                |                |                |                |
|------------|----------------------|----------------|----------------|----------------|----------------|----------------|----------------|----------------|----------------|----------------|----------------|
|            |                      | M <sub>0</sub> | M <sub>1</sub> | M <sub>2</sub> | M <sub>3</sub> | M <sub>4</sub> | M <sub>5</sub> | M <sub>6</sub> | M <sub>7</sub> | M <sub>8</sub> | M <sub>9</sub> |
| Ala        | [M-57] <sup>+</sup>  | 0.52           | 0.04           | 0.03           | 0.41           |                |                |                |                |                |                |
|            | [M-159] <sup>+</sup> | 0.52           | 0.05           | 0.43           |                |                |                |                |                |                |                |
|            | f(302) <sup>+</sup>  | 0.82           | 0.09           | 0.09           |                |                |                |                |                |                |                |
| Gly        | [M-57] <sup>+</sup>  | 0.78           | 0.04           | 0.19           |                |                |                |                |                |                |                |
|            | [M-85] <sup>+</sup>  | 0.79           | 0.21           |                |                |                |                |                |                |                |                |
| Val        | [M-57] <sup>+</sup>  | 0.91           | 0.05           | 0.00           | 0.00           | 0.00           | 0.04           |                |                |                |                |
|            | [M-159] <sup>+</sup> | 0.91           | 0.04           | 0.01           | 0.01           | 0.03           |                |                |                |                |                |
|            | f(302) <sup>+</sup>  | 0.92           | 0.04           | 0.04           |                |                |                |                |                |                |                |
| Leu        | [M-15] <sup>+</sup>  | 0.47           | 0.03           | 0.18           | 0.27           | 0.03           | 0.02           | 0.01           |                |                |                |
|            | [M-159] <sup>+</sup> | 0.74           | 0.20           | 0.02           | 0.01           | 0.01           | 0.02           |                |                |                |                |
|            | f(302) <sup>+</sup>  | 0.98           | 0.02           | 0.00           |                |                |                |                |                |                |                |
| Ile        | [M-15] <sup>+</sup>  | 0.82           | 0.06           | 0.06           | 0.02           | 0.02           | 0.00           | 0.02           |                |                |                |
|            | [M-159] <sup>+</sup> | 0.82           | 0.06           | 0.08           | 0.01           | 0.02           | 0.02           |                |                |                |                |
|            | f(302) <sup>+</sup>  | 0.92           | 0.02           | 0.06           |                |                |                |                |                |                |                |
| Meth       | [M-57] <sup>+</sup>  | 0.95           | 0.03           | 0.00           | 0.01           | 0.01           | 0.00           |                |                |                |                |
|            | [M-159] <sup>+</sup> | 0.95           | 0.04           | 0.01           | 0.00           | 0.00           |                |                |                |                |                |
|            | f(302) <sup>+</sup>  | 0.51           | 0.49           | 0.00           |                |                |                |                |                |                |                |
| Pro        | [M-57] <sup>+</sup>  | 0.74           | 0.04           | 0.04           | 0.07           | 0.05           | 0.06           |                |                |                |                |
|            | [M-159] <sup>+</sup> | 0.84           | 0.05           | 0.05           | 0.03           | 0.03           |                |                |                |                |                |
|            | f(302) <sup>+</sup>  | 0.49           | 0.26           | 0.25           |                |                |                |                |                |                |                |
| Ser        | [M-57] <sup>+</sup>  | 0.65           | 0.09           | 0.08           | 0.18           |                |                |                |                |                |                |
|            | [M-159] <sup>+</sup> | 0.67           | 0.14           | 0.19           |                |                |                |                |                |                |                |
|            | f(302) <sup>+</sup>  | 0.71           | 0.06           | 0.23           |                |                |                |                |                |                |                |
| Thr        | [M-57] <sup>+</sup>  | 0.78           | 0.05           | 0.05           | 0.07           | 0.05           |                |                |                |                |                |
|            | [M-85] <sup>+</sup>  | 0.78           | 0.10           | 0.06           | 0.06           |                |                |                |                |                |                |
|            | f(302) <sup>+</sup>  | 0.38           | 0.54           | 0.08           |                |                |                |                |                |                |                |
| Phe        | [M-57] <sup>+</sup>  | 0.90           | 0.10           | 0.00           | 0.00           | 0.00           | 0.00           | 0.00           | 0.00           | 0.00           |                |
|            | [M-159] <sup>+</sup> | 0.91           | 0.08           | 0.00           | 0.00           | 0.00           | 0.00           | 0.00           | 0.00           | 0.00           |                |
|            | f(302) <sup>+</sup>  | 0.98           | 0.02           | 0.00           |                |                |                |                |                |                |                |
| Asp        | [M-57] <sup>+</sup>  | 0.51           | 0.10           | 0.17           | 0.14           | 0.08           |                |                |                |                |                |
|            | [M-159] <sup>+</sup> | 0.53           | 0.15           | 0.20           | 0.12           |                |                |                |                |                |                |
|            | f(302) <sup>+</sup>  | 0.64           | 0.12           | 0.24           |                |                |                |                |                |                |                |
| Glu        | [M-57] <sup>+</sup>  | 0.35           | 0.08           | 0.21           | 0.12           | 0.14           | 0.10           |                |                |                |                |
|            | [M-159] <sup>+</sup> | 0.36           | 0.10           | 0.23           | 0.18           | 0.13           |                |                |                |                |                |
|            | f(302) <sup>+</sup>  | 0.53           | 0.23           | 0.24           |                |                |                |                |                |                |                |
| Lys        | [M-57] <sup>+</sup>  | 0.88           | 0.05           | 0.03           | 0.00           | 0.02           | 0.02           | 0.00           |                |                |                |
|            | [M-159] <sup>+</sup> | 0.90           | 0.06           | 0.00           | 0.01           | 0.02           | 0.01           |                |                |                |                |
|            | f(302) <sup>+</sup>  | 0.85           | 0.10           | 0.05           |                |                |                |                |                |                |                |
| His        | [M-57] <sup>+</sup>  | 0.96           | 0.03           | 0.01           | 0.00           | 0.00           | 0.00           | 0.00           |                |                |                |
|            | [M-159] <sup>+</sup> | 0.94           | 0.04           | 0.00           | 0.02           | 0.00           | 0.00           |                |                |                |                |
|            | f(302) <sup>+</sup>  | 1.00           | 0.00           | 0.00           |                |                |                |                |                |                |                |
| Tyr        | [M-57] <sup>+</sup>  | 0.90           | 0.08           | 0.00           | 0.00           | 0.00           | 0.00           | 0.01           | 0.00           | 0.00           | 0.01           |
|            | [M-159] <sup>+</sup> | 0.90           | 0.07           | 0.01           | 0.00           | 0.00           | 0.01           | 0.01           | 0.00           | 0.00           |                |
|            | f(302) <sup>+</sup>  | 0.97           | 0.02           | 0.01           |                |                |                |                |                |                |                |

<sup>13</sup>C Pyruvate + Glyoxylate

| Amino Acid | TBDMS Fragment       | MID            |                |                |                |                |                |                |                |                |                |
|------------|----------------------|----------------|----------------|----------------|----------------|----------------|----------------|----------------|----------------|----------------|----------------|
|            |                      | M <sub>0</sub> | M <sub>1</sub> | M <sub>2</sub> | M <sub>3</sub> | M <sub>4</sub> | M <sub>5</sub> | M <sub>6</sub> | M <sub>7</sub> | M <sub>8</sub> | M <sub>9</sub> |
| Ala        | [M-57] <sup>+</sup>  | 0.59           | 0.06           | 0.12           | 0.23           |                |                |                |                |                |                |
|            | [M-159] <sup>+</sup> | 0.65           | 0.08           | 0.27           |                |                |                |                |                |                |                |
|            | f(302) <sup>+</sup>  | 0.75           | 0.04           | 0.21           |                |                |                |                |                |                |                |
| Gly        | [M-57] <sup>+</sup>  | 0.82           | 0.06           | 0.12           |                |                |                |                |                |                |                |
|            | [M-85] <sup>+</sup>  | 0.87           | 0.13           |                |                |                |                |                |                |                |                |
| Val        | [M-57] <sup>+</sup>  | 0.88           | 0.06           | 0.00           | 0.01           | 0.01           | 0.04           |                |                |                |                |
|            | [M-159] <sup>+</sup> | 0.89           | 0.04           | 0.01           | 0.03           | 0.03           |                |                |                |                |                |
|            | f(302) <sup>+</sup>  | 0.98           | 0.00           | 0.02           |                |                |                |                |                |                |                |
| Leu        | [M-15] <sup>+</sup>  | 0.53           | 0.04           | 0.13           | 0.25           | 0.00           | 0.02           | 0.03           |                |                |                |
|            | [M-159] <sup>+</sup> | 0.74           | 0.19           | 0.01           | 0.01           | 0.02           | 0.03           |                |                |                |                |
|            | f(302) <sup>+</sup>  | 0.78           | 0.05           | 0.17           |                |                |                |                |                |                |                |
| Ile        | [M-15] <sup>+</sup>  | 0.85           | 0.12           | 0.03           | 0.00           | 0.00           | 0.00           | 0.00           |                |                |                |
|            | [M-159] <sup>+</sup> | 0.83           | 0.05           | 0.05           | 0.02           | 0.03           | 0.02           |                |                |                |                |
|            | f(302) <sup>+</sup>  | 0.92           | 0.03           | 0.05           |                |                |                |                |                |                |                |
| Meth       | [M-57] <sup>+</sup>  | 0.92           | 0.06           | 0.00           | 0.01           | 0.01           | 0.00           |                |                |                |                |
|            | [M-159] <sup>+</sup> | 0.94           | 0.05           | 0.01           | 0.00           | 0.00           |                |                |                |                |                |
|            | f(302) <sup>+</sup>  | 0.42           | 0.49           | 0.09           |                |                |                |                |                |                |                |
| Pro        | [M-57] <sup>+</sup>  | 0.15           | 0.01           | 0.00           | 0.03           | 0.04           | 0.77           |                |                |                |                |
|            | [M-159] <sup>+</sup> | 0.86           | 0.06           | 0.02           | 0.04           | 0.02           |                |                |                |                |                |
|            | f(302) <sup>+</sup>  | 1.00           | 0.00           | 0.00           |                |                |                |                |                |                |                |
| Ser        | [M-57] <sup>+</sup>  | 0.69           | 0.13           | 0.09           | 0.09           |                |                |                |                |                |                |
|            | [M-159] <sup>+</sup> | 0.72           | 0.16           | 0.12           |                |                |                |                |                |                |                |
|            | f(302) <sup>+</sup>  | 0.78           | 0.07           | 0.15           |                |                |                |                |                |                |                |
| Thr        | [M-57] <sup>+</sup>  | 0.74           | 0.10           | 0.08           | 0.07           | 0.01           |                |                |                |                |                |
|            | [M-85] <sup>+</sup>  | 0.69           | 0.15           | 0.09           | 0.07           |                |                |                |                |                |                |
|            | f(302) <sup>+</sup>  | 0.37           | 0.53           | 0.10           |                |                |                |                |                |                |                |
| Phe        | [M-57] <sup>+</sup>  | 0.92           | 0.07           | 0.01           | 0.00           | 0.00           | 0.00           | 0.00           | 0.00           | 0.00           |                |
|            | [M-159] <sup>+</sup> | 0.91           | 0.08           | 0.01           | 0.00           | 0.00           | 0.00           | 0.00           | 0.00           | 0.00           |                |
|            | f(302) <sup>+</sup>  | 0.98           | 0.01           | 0.01           |                |                |                |                |                |                |                |
| Asp        | [M-57] <sup>+</sup>  | 0.47           | 0.12           | 0.23           | 0.13           | 0.05           |                |                |                |                |                |
|            | [M-159] <sup>+</sup> | 0.49           | 0.19           | 0.24           | 0.08           |                |                |                |                |                |                |
|            | f(302) <sup>+</sup>  | 0.64           | 0.15           | 0.21           |                |                |                |                |                |                |                |
| Glu        | [M-57] <sup>+</sup>  | 0.37           | 0.08           | 0.17           | 0.16           | 0.17           | 0.05           |                |                |                |                |
|            | [M-159] <sup>+</sup> | 0.38           | 0.11           | 0.19           | 0.24           | 0.08           |                |                |                |                |                |
|            | f(302) <sup>+</sup>  | 0.47           | 0.25           | 0.28           |                |                |                |                |                |                |                |
| Lys        | [M-57] <sup>+</sup>  | 0.88           | 0.09           | 0.02           | 0.00           | 0.01           | 0.00           | 0.00           |                |                |                |
|            | [M-159] <sup>+</sup> | 0.86           | 0.09           | 0.02           | 0.01           | 0.02           | 0.00           |                |                |                |                |
|            | f(302) <sup>+</sup>  | 0.76           | 0.17           | 0.07           |                |                |                |                |                |                |                |
| His        | [M-57] <sup>+</sup>  | 0.92           | 0.07           | 0.01           | 0.00           | 0.00           | 0.00           | 0.00           |                |                |                |
|            | [M-159] <sup>+</sup> | 0.91           | 0.05           | 0.01           | 0.03           | 0.00           | 0.00           |                |                |                |                |
|            | f(302) <sup>+</sup>  | 1.00           | 0.00           | 0.00           |                |                |                |                |                |                |                |
| Tyr        | [M-57] <sup>+</sup>  | 0.89           | 0.07           | 0.01           | 0.00           | 0.00           | 0.00           | 0.01           | 0.01           | 0.00           | 0.01           |
|            | [M-159] <sup>+</sup> | 0.89           | 0.07           | 0.00           | 0.01           | 0.00           | 0.00           | 0.01           | 0.01           | 0.00           |                |
|            | f(302) <sup>+</sup>  | 0.96           | 0.02           | 0.02           |                |                |                |                |                |                |                |

<sup>13</sup>C Pyruvate +OAA

| Amino Acid | TBDMS Fragment       | MID            |                |                |                |                |                |                |                |                |                |
|------------|----------------------|----------------|----------------|----------------|----------------|----------------|----------------|----------------|----------------|----------------|----------------|
|            |                      | M <sub>0</sub> | M <sub>1</sub> | M <sub>2</sub> | M <sub>3</sub> | M <sub>4</sub> | M <sub>5</sub> | M <sub>6</sub> | M <sub>7</sub> | M <sub>8</sub> | M <sub>9</sub> |
| Ala        | [M-57] <sup>+</sup>  | 0.68           | 0.04           | 0.04           | 0.24           |                |                |                |                |                |                |
|            | [M-159] <sup>+</sup> | 0.70           | 0.04           | 0.26           |                |                |                |                |                |                |                |
|            | f(302) <sup>+</sup>  | 0.90           | 0.02           | 0.08           |                |                |                |                |                |                |                |
| Gly        | [M-57] <sup>+</sup>  | 0.79           | 0.04           | 0.17           |                |                |                |                |                |                |                |
|            | [M-85] <sup>+</sup>  | 0.82           | 0.18           |                |                |                |                |                |                |                |                |
| Val        | [M-57] <sup>+</sup>  | 0.87           | 0.06           | 0.02           | 0.02           | 0.01           | 0.02           |                |                |                |                |
|            | [M-159] <sup>+</sup> | 0.88           | 0.04           | 0.04           | 0.02           | 0.02           |                |                |                |                |                |
|            | f(302) <sup>+</sup>  | 0.94           | 0.03           | 0.03           |                |                |                |                |                |                |                |
| Leu        | [M-15] <sup>+</sup>  | 0.61           | 0.06           | 0.15           | 0.13           | 0.03           | 0.01           | 0.01           |                |                |                |
|            | [M-159] <sup>+</sup> | 0.77           | 0.06           | 0.13           | 0.01           | 0.02           | 0.01           |                |                |                |                |
|            | f(302) <sup>+</sup>  | 0.83           | 0.03           | 0.14           |                |                |                |                |                |                |                |
| Ile        | [M-15] <sup>+</sup>  | 0.77           | 0.09           | 0.08           | 0.02           | 0.01           | 0.03           | 0.00           |                |                |                |
|            | [M-159] <sup>+</sup> | 0.79           | 0.06           | 0.09           | 0.03           | 0.02           | 0.01           |                |                |                |                |
|            | f(302) <sup>+</sup>  | 0.89           | 0.05           | 0.06           |                |                |                |                |                |                |                |
| Meth       | [M-57] <sup>+</sup>  | 0.94           | 0.06           | 0.00           | 0.00           | 0.00           | 0.00           |                |                |                |                |
|            | [M-159] <sup>+</sup> | 0.95           | 0.05           | 0.00           | 0.00           | 0.00           |                |                |                |                |                |
|            | f(302) <sup>+</sup>  | 0.51           | 0.45           | 0.04           |                |                |                |                |                |                |                |
| Pro        | [M-57] <sup>+</sup>  | 0.71           | 0.06           | 0.02           | 0.07           | 0.07           | 0.07           |                |                |                |                |
|            | [M-159] <sup>+</sup> | 0.86           | 0.06           | 0.04           | 0.02           | 0.02           |                |                |                |                |                |
|            | f(302) <sup>+</sup>  | 0.71           | 0.21           | 0.08           |                |                |                |                |                |                |                |
| Ser        | [M-57] <sup>+</sup>  | 0.65           | 0.12           | 0.08           | 0.15           |                |                |                |                |                |                |
|            | [M-159] <sup>+</sup> | 0.67           | 0.17           | 0.16           |                |                |                |                |                |                |                |
|            | f(302) <sup>+</sup>  | 0.74           | 0.06           | 0.20           |                |                |                |                |                |                |                |
| Thr        | [M-57] <sup>+</sup>  | 0.75           | 0.08           | 0.07           | 0.07           | 0.03           |                |                |                |                |                |
|            | [M-85] <sup>+</sup>  | 0.75           | 0.13           | 0.09           | 0.03           |                |                |                |                |                |                |
|            | f(302) <sup>+</sup>  | 0.36           | 0.55           | 0.09           |                |                |                |                |                |                |                |
| Phe        | [M-57] <sup>+</sup>  | 0.91           | 0.08           | 0.01           | 0.00           | 0.00           | 0.00           | 0.00           | 0.00           | 0.00           |                |
|            | [M-159] <sup>+</sup> | 0.91           | 0.08           | 0.01           | 0.00           | 0.00           | 0.00           | 0.00           | 0.00           | 0.00           |                |
|            | f(302) <sup>+</sup>  | 0.98           | 0.02           | 0.00           |                |                |                |                |                |                |                |
| Asp        | [M-57] <sup>+</sup>  | 0.49           | 0.14           | 0.17           | 0.14           | 0.06           |                |                |                |                |                |
|            | [M-159] <sup>+</sup> | 0.52           | 0.19           | 0.19           | 0.10           |                |                |                |                |                |                |
|            | f(302) <sup>+</sup>  | 0.64           | 0.14           | 0.22           |                |                |                |                |                |                |                |
| Glu        | [M-57] <sup>+</sup>  | 0.39           | 0.11           | 0.22           | 0.14           | 0.10           | 0.04           |                |                |                |                |
|            | [M-159] <sup>+</sup> | 0.41           | 0.15           | 0.22           | 0.14           | 0.08           |                |                |                |                |                |
|            | f(302) <sup>+</sup>  | 0.55           | 0.28           | 0.17           |                |                |                |                |                |                |                |
| Lys        | [M-57] <sup>+</sup>  | 0.88           | 0.09           | 0.00           | 0.01           | 0.02           | 0.00           | 0.00           |                |                |                |
|            | [M-159] <sup>+</sup> | 0.90           | 0.05           | 0.02           | 0.01           | 0.01           | 0.01           |                |                |                |                |
|            | f(302) <sup>+</sup>  | 0.84           | 0.11           | 0.05           |                |                |                |                |                |                |                |
| His        | [M-57] <sup>+</sup>  | 0.95           | 0.05           | 0.00           | 0.00           | 0.00           | 0.00           | 0.00           |                |                |                |
|            | [M-159] <sup>+</sup> | 0.94           | 0.04           | 0.01           | 0.02           | 0.00           | 0.00           |                |                |                |                |
|            | f(302) <sup>+</sup>  | 0.98           | 0.02           | 0.00           |                |                |                |                |                |                |                |
| Tyr        | [M-57] <sup>+</sup>  | 0.88           | 0.09           | 0.00           | 0.00           | 0.01           | 0.01           | 0.01           | 0.00           | 0.00           |                |
|            | [M-159] <sup>+</sup> | 0.88           | 0.07           | 0.01           | 0.01           | 0.01           | 0.01           | 0.01           | 0.00           | 0.00           |                |
|            | f(302) <sup>+</sup>  | 0.96           | 0.02           | 0.02           |                |                |                |                |                |                |                |

**Pyruvate + <sup>13</sup>C Formate**

| Amino Acid | TBDMS Fragment       | MID            |                |                |                |                |                |                |                |                |                |
|------------|----------------------|----------------|----------------|----------------|----------------|----------------|----------------|----------------|----------------|----------------|----------------|
|            |                      | M <sub>0</sub> | M <sub>1</sub> | M <sub>2</sub> | M <sub>3</sub> | M <sub>4</sub> | M <sub>5</sub> | M <sub>6</sub> | M <sub>7</sub> | M <sub>8</sub> | M <sub>9</sub> |
| Ala        | [M-57] <sup>+</sup>  | 0.96           | 0.04           | 0.00           | 0.00           |                |                |                |                |                |                |
|            | [M-159] <sup>+</sup> | 0.93           | 0.04           | 0.03           |                |                |                |                |                |                |                |
|            | f(302) <sup>+</sup>  | 0.99           | 0.01           | 0.00           |                |                |                |                |                |                |                |
| Gly        | [M-57] <sup>+</sup>  | 0.97           | 0.03           | 0.00           |                |                |                |                |                |                |                |
|            | [M-85] <sup>+</sup>  | 1.00           | 0.00           |                |                |                |                |                |                |                |                |
| Val        | [M-57] <sup>+</sup>  | 0.94           | 0.06           | 0.00           | 0.00           | 0.00           | 0.00           |                |                |                |                |
|            | [M-159] <sup>+</sup> | 0.95           | 0.04           | 0.00           | 0.01           | 0.00           |                |                |                |                |                |
|            | f(302) <sup>+</sup>  | 0.97           | 0.03           | 0.00           |                |                |                |                |                |                |                |
| Leu        | [M-15] <sup>+</sup>  | 0.77           | 0.08           | 0.03           | 0.11           | 0.01           | 0.00           | 0.00           |                |                |                |
|            | [M-159] <sup>+</sup> | 0.94           | 0.05           | 0.01           | 0.00           | 0.00           | 0.00           |                |                |                |                |
|            | f(302) <sup>+</sup>  | 0.96           | 0.04           | 0.00           |                |                |                |                |                |                |                |
| Ile        | [M-15] <sup>+</sup>  | 0.88           | 0.10           | 0.00           | 0.02           | 0.00           | 0.00           | 0.00           |                |                |                |
|            | [M-159] <sup>+</sup> | 0.94           | 0.06           | 0.00           | 0.00           | 0.00           | 0.00           |                |                |                |                |
|            | f(302) <sup>+</sup>  | 0.98           | 0.02           | 0.00           |                |                |                |                |                |                |                |
| Meth       | [M-57] <sup>+</sup>  | 0.92           | 0.06           | 0.02           | 0.00           | 0.00           | 0.00           |                |                |                |                |
|            | [M-159] <sup>+</sup> | 0.95           | 0.03           | 0.02           | 0.00           | 0.00           |                |                |                |                |                |
|            | f(302) <sup>+</sup>  | 0.45           | 0.43           | 0.12           |                |                |                |                |                |                |                |
| Pro        | [M-57] <sup>+</sup>  | 0.80           | 0.06           | 0.00           | 0.13           | 0.01           | 0.00           |                |                |                |                |
|            | [M-159] <sup>+</sup> | 0.96           | 0.04           | 0.00           | 0.00           | 0.00           |                |                |                |                |                |
|            | f(302) <sup>+</sup>  | 0.95           | 0.05           | 0.00           |                |                |                |                |                |                |                |
| Ser        | [M-57] <sup>+</sup>  | 0.48           | 0.51           | 0.01           | 0.00           |                |                |                |                |                |                |
|            | [M-159] <sup>+</sup> | 0.50           | 0.50           | 0.00           |                |                |                |                |                |                |                |
|            | f(302) <sup>+</sup>  | 0.97           | 0.02           | 0.01           |                |                |                |                |                |                |                |
| Thr        | [M-57] <sup>+</sup>  | 0.92           | 0.08           | 0.00           | 0.00           | 0.00           |                |                |                |                |                |
|            | [M-85] <sup>+</sup>  | 0.96           | 0.04           | 0.00           | 0.00           |                |                |                |                |                |                |
|            | f(302) <sup>+</sup>  | 0.41           | 0.57           | 0.02           |                |                |                |                |                |                |                |
| Phe        | [M-57] <sup>+</sup>  | 0.91           | 0.08           | 0.01           | 0.00           | 0.00           | 0.00           | 0.00           | 0.00           | 0.00           |                |
|            | [M-159] <sup>+</sup> | 0.92           | 0.08           | 0.00           | 0.00           | 0.00           | 0.00           | 0.00           | 0.00           | 0.00           |                |
|            | f(302) <sup>+</sup>  | 0.98           | 0.02           | 0.00           |                |                |                |                |                |                |                |
| Asp        | [M-57] <sup>+</sup>  | 0.89           | 0.11           | 0.00           | 0.00           | 0.00           |                |                |                |                |                |
|            | [M-159] <sup>+</sup> | 0.90           | 0.09           | 0.00           | 0.01           |                |                |                |                |                |                |
|            | f(302) <sup>+</sup>  | 0.96           | 0.04           | 0.00           |                |                |                |                |                |                |                |
| Glu        | [M-57] <sup>+</sup>  | 0.86           | 0.13           | 0.01           | 0.00           | 0.00           | 0.00           |                |                |                |                |
|            | [M-159] <sup>+</sup> | 0.94           | 0.06           | 0.00           | 0.00           | 0.00           |                |                |                |                |                |
|            | f(302) <sup>+</sup>  | 0.86           | 0.13           | 0.01           |                |                |                |                |                |                |                |
| Lys        | [M-57] <sup>+</sup>  | 0.92           | 0.05           | 0.03           | 0.00           | 0.00           | 0.00           | 0.00           |                |                |                |
|            | [M-159] <sup>+</sup> | 0.95           | 0.05           | 0.00           | 0.00           | 0.00           | 0.00           |                |                |                |                |
|            | f(302) <sup>+</sup>  | 0.98           | 0.02           | 0.00           |                |                |                |                |                |                |                |
| His        | [M-57] <sup>+</sup>  | 0.96           | 0.04           | 0.00           | 0.00           | 0.00           | 0.00           | 0.00           |                |                |                |
|            | [M-159] <sup>+</sup> | 0.88           | 0.06           | 0.00           | 0.06           | 0.00           | 0.00           |                |                |                |                |
|            | f(302) <sup>+</sup>  | 0.96           | 0.04           | 0.00           |                |                |                |                |                |                |                |
| Tyr        | [M-57] <sup>+</sup>  | 0.92           | 0.07           | 0.01           | 0.00           | 0.00           | 0.00           | 0.00           | 0.00           | 0.00           |                |
|            | [M-159] <sup>+</sup> | 0.92           | 0.07           | 0.00           | 0.01           | 0.00           | 0.00           | 0.00           | 0.00           | 0.00           |                |
|            | f(302) <sup>+</sup>  | 0.98           | 0.02           | 0.00           |                |                |                |                |                |                |                |



**<sup>13</sup>C Vanillin + <sup>13</sup>C Formate**

| Amino Acid | TBDMS Fragment       | MID            |                |                |                |                |                |                |                |                |                |
|------------|----------------------|----------------|----------------|----------------|----------------|----------------|----------------|----------------|----------------|----------------|----------------|
|            |                      | M <sub>0</sub> | M <sub>1</sub> | M <sub>2</sub> | M <sub>3</sub> | M <sub>4</sub> | M <sub>5</sub> | M <sub>6</sub> | M <sub>7</sub> | M <sub>8</sub> | M <sub>9</sub> |
| Ala        | [M-57] <sup>+</sup>  | 0.97           | 0.03           | 0.00           | 0.00           |                |                |                |                |                |                |
|            | [M-159] <sup>+</sup> | 0.94           | 0.04           | 0.02           |                |                |                |                |                |                |                |
|            | f(302) <sup>+</sup>  | 0.96           | 0.03           | 0.01           |                |                |                |                |                |                |                |
| Gly        | [M-57] <sup>+</sup>  | 0.97           | 0.03           | 0.00           |                |                |                |                |                |                |                |
|            | [M-85] <sup>+</sup>  | 0.99           | 0.01           |                |                |                |                |                |                |                |                |
| Val        | [M-57] <sup>+</sup>  | 0.95           | 0.05           | 0.00           | 0.00           | 0.00           | 0.00           |                |                |                |                |
|            | [M-159] <sup>+</sup> | 0.95           | 0.04           | 0.00           | 0.01           | 0.00           |                |                |                |                |                |
|            | f(302) <sup>+</sup>  | 0.97           | 0.02           | 0.01           |                |                |                |                |                |                |                |
| Leu        | [M-15] <sup>+</sup>  | 0.93           | 0.07           | 0.00           | 0.00           | 0.00           | 0.00           | 0.00           |                |                |                |
|            | [M-159] <sup>+</sup> | 0.94           | 0.05           | 0.01           | 0.00           | 0.00           | 0.00           |                |                |                |                |
|            | f(302) <sup>+</sup>  | 0.98           | 0.02           | 0.00           |                |                |                |                |                |                |                |
| Ile        | [M-15] <sup>+</sup>  | 0.98           | 0.02           | 0.00           | 0.00           | 0.00           | 0.00           | 0.00           |                |                |                |
|            | [M-159] <sup>+</sup> | 0.95           | 0.05           | 0.00           | 0.00           | 0.00           | 0.00           |                |                |                |                |
|            | f(302) <sup>+</sup>  | 0.99           | 0.01           | 0.00           |                |                |                |                |                |                |                |
| Meth       | [M-57] <sup>+</sup>  | 0.93           | 0.06           | 0.01           | 0.00           | 0.00           | 0.00           |                |                |                |                |
|            | [M-159] <sup>+</sup> | 0.96           | 0.04           | 0.00           | 0.00           | 0.00           |                |                |                |                |                |
|            | f(302) <sup>+</sup>  | 0.52           | 0.41           | 0.07           |                |                |                |                |                |                |                |
| Pro        | [M-57] <sup>+</sup>  | 0.94           | 0.04           | 0.00           | 0.01           | 0.01           | 0.00           |                |                |                |                |
|            | [M-159] <sup>+</sup> | 0.96           | 0.04           | 0.00           | 0.00           | 0.00           |                |                |                |                |                |
|            | f(302) <sup>+</sup>  | 0.78           | 0.22           | 0.0            |                |                |                |                |                |                |                |
| Ser        | [M-57] <sup>+</sup>  | 0.73           | 0.26           | 0.01           | 0.00           |                |                |                |                |                |                |
|            | [M-159] <sup>+</sup> | 0.74           | 0.26           | 0.00           |                |                |                |                |                |                |                |
|            | f(302) <sup>+</sup>  | 0.97           | 0.03           | 0.00           |                |                |                |                |                |                |                |
| Thr        | [M-57] <sup>+</sup>  | 0.87           | 0.09           | 0.04           | 0.00           | 0.00           |                |                |                |                |                |
|            | [M-85] <sup>+</sup>  | 0.99           | 0.01           | 0.00           | 0.00           |                |                |                |                |                |                |
|            | f(302) <sup>+</sup>  | 0.42           | 0.56           | 0.02           |                |                |                |                |                |                |                |
| Phe        | [M-57] <sup>+</sup>  | 0.90           | 0.10           | 0.00           | 0.00           | 0.00           | 0.00           | 0.00           | 0.00           | 0.00           | 0.00           |
|            | [M-159] <sup>+</sup> | 0.91           | 0.08           | 0.01           | 0.00           | 0.00           | 0.00           | 0.00           | 0.00           | 0.00           |                |
|            | f(302) <sup>+</sup>  | 0.98           | 0.02           | 0.00           |                |                |                |                |                |                |                |
| Asp        | [M-57] <sup>+</sup>  | 0.94           | 0.06           | 0.00           | 0.00           | 0.00           |                |                |                |                |                |
|            | [M-159] <sup>+</sup> | 0.95           | 0.05           | 0.00           | 0.00           |                |                |                |                |                |                |
|            | f(302) <sup>+</sup>  | 0.98           | 0.02           | 0.00           |                |                |                |                |                |                |                |
| Glu        | [M-57] <sup>+</sup>  | 0.93           | 0.06           | 0.01           | 0.00           | 0.00           | 0.00           |                |                |                |                |
|            | [M-159] <sup>+</sup> | 0.95           | 0.05           | 0.00           | 0.00           | 0.00           |                |                |                |                |                |
|            | f(302) <sup>+</sup>  | 0.91           | 0.08           | 0.01           |                |                |                |                |                |                |                |
| Lys        | [M-57] <sup>+</sup>  | 0.95           | 0.05           | 0.00           | 0.00           | 0.00           | 0.00           | 0.00           |                |                |                |
|            | [M-159] <sup>+</sup> | 0.93           | 0.07           | 0.00           | 0.00           | 0.00           | 0.00           |                |                |                |                |
|            | f(302) <sup>+</sup>  | 0.98           | 0.02           | 0.00           |                |                |                |                |                |                |                |
| His        | [M-57] <sup>+</sup>  | 0.57           | 0.40           | 0.02           | 0.01           | 0.00           | 0.00           | 0.00           |                |                |                |
|            | [M-159] <sup>+</sup> | 0.50           | 0.45           | 0.02           | 0.02           | 0.01           | 0.00           |                |                |                |                |
|            | f(302) <sup>+</sup>  | 0.93           | 0.07           | 0.00           |                |                |                |                |                |                |                |
| Tyr        | [M-57] <sup>+</sup>  | 0.91           | 0.09           | 0.00           | 0.00           | 0.00           | 0.00           | 0.00           | 0.00           | 0.00           | 0.00           |
|            | [M-159] <sup>+</sup> | 0.92           | 0.08           | 0.00           | 0.00           | 0.00           | 0.00           | 0.00           | 0.00           | 0.00           |                |
|            | f(302) <sup>+</sup>  | 0.98           | 0.02           | 0.00           |                |                |                |                |                |                |                |

| Ring <sup>13</sup> C Vanillin + Methanol |                      |                |                |                |                |                |                |                |                |                |                |
|------------------------------------------|----------------------|----------------|----------------|----------------|----------------|----------------|----------------|----------------|----------------|----------------|----------------|
| Amino Acid                               | TBDMS Fragment       | MID            |                |                |                |                |                |                |                |                |                |
|                                          |                      | M <sub>0</sub> | M <sub>1</sub> | M <sub>2</sub> | M <sub>3</sub> | M <sub>4</sub> | M <sub>5</sub> | M <sub>6</sub> | M <sub>7</sub> | M <sub>8</sub> | M <sub>9</sub> |
| Ala                                      | [M-57] <sup>+</sup>  | 0.07           | 0.01           | 0.12           | 0.80           |                |                |                |                |                |                |
|                                          | [M-159] <sup>+</sup> | 0.07           | 0.04           | 0.89           |                |                |                |                |                |                |                |
| Gly                                      | [M-57] <sup>+</sup>  | 0.10           | 0.35           | 0.55           |                |                |                |                |                |                |                |
|                                          | [M-85] <sup>+</sup>  | 0.11           | 0.89           |                |                |                |                |                |                |                |                |
| Val                                      | [M-57] <sup>+</sup>  | 0.16           | 0.01           | 0.00           | 0.01           | 0.12           | 0.70           |                |                |                |                |
|                                          | [M-159] <sup>+</sup> | 0.17           | 0.01           | 0.01           | 0.04           | 0.77           |                |                |                |                |                |
| Leu                                      | [M-15] <sup>+</sup>  | 0.06           | 0.01           | 0.04           | 0.02           | 0.02           | 0.12           | 0.73           |                |                |                |
|                                          | [M-159] <sup>+</sup> | 0.08           | 0.05           | 0.00           | 0.01           | 0.06           | 0.80           |                |                |                |                |
| Ile                                      | [M-15] <sup>+</sup>  | 0.17           | 0.03           | 0.07           | 0.01           | 0.05           | 0.42           | 0.25           |                |                |                |
|                                          | [M-159] <sup>+</sup> | 0.18           | 0.01           | 0.06           | 0.02           | 0.15           | 0.58           |                |                |                |                |
| Meth                                     | [M-57] <sup>+</sup>  | 0.18           | 0.02           | 0.02           | 0.54           | 0.24           | 0.00           |                |                |                |                |
|                                          | [M-159] <sup>+</sup> | 0.18           | 0.02           | 0.15           | 0.65           | 0.00           |                |                |                |                |                |
| Ser                                      | [M-57] <sup>+</sup>  | 0.08           | 0.18           | 0.46           | 0.28           |                |                |                |                |                |                |
|                                          | [M-159] <sup>+</sup> | 0.09           | 0.44           | 0.47           |                |                |                |                |                |                |                |
| Thr                                      | [M-57] <sup>+</sup>  | 0.11           | 0.01           | 0.03           | 0.56           | 0.29           |                |                |                |                |                |
|                                          | [M-85] <sup>+</sup>  | 0.13           | 0.01           | 0.17           | 0.70           |                |                |                |                |                |                |
| Phe                                      | [M-57] <sup>+</sup>  | 0.29           | 0.02           | 0.00           | 0.00           | 0.00           | 0.01           | 0.06           | 0.20           | 0.28           | 0.14           |
|                                          | [M-159] <sup>+</sup> | 0.29           | 0.02           | 0.00           | 0.00           | 0.00           | 0.02           | 0.12           | 0.31           | 0.24           |                |
|                                          | f(302) <sup>+</sup>  | 0.32           | 0.30           | 0.38           |                |                |                |                |                |                |                |
| Asp                                      | [M-57] <sup>+</sup>  | 0.04           | 0.01           | 0.03           | 0.62           | 0.30           |                |                |                |                |                |
|                                          | [M-159] <sup>+</sup> | 0.05           | 0.01           | 0.18           | 0.76           |                |                |                |                |                |                |
|                                          | f(302) <sup>+</sup>  | 0.06           | 0.48           | 0.46           |                |                |                |                |                |                |                |
| Glu                                      | [M-57] <sup>+</sup>  | 0.04           | 0.01           | 0.01           | 0.02           | 0.19           | 0.73           |                |                |                |                |
|                                          | [M-159] <sup>+</sup> | 0.04           | 0.01           | 0.02           | 0.05           | 0.88           |                |                |                |                |                |
| Lys                                      | [M-57] <sup>+</sup>  | 0.25           | 0.02           | 0.01           | 0.01           | 0.03           | 0.33           | 0.35           |                |                |                |
|                                          | [M-159] <sup>+</sup> | 0.27           | 0.02           | 0.01           | 0.01           | 0.14           | 0.55           |                |                |                |                |
| His                                      | [M-57] <sup>+</sup>  | 0.32           | 0.02           | 0.01           | 0.05           | 0.26           | 0.31           | 0.03           |                |                |                |
|                                          | [M-159] <sup>+</sup> | 0.33           | 0.03           | 0.05           | 0.26           | 0.30           | 0.03           |                |                |                |                |
| Tyr                                      | [M-57] <sup>+</sup>  | 0.16           | 0.02           | 0.00           | 0.00           | 0.00           | 0.01           | 0.06           | 0.22           | 0.35           | 0.18           |
|                                          | [M-159] <sup>+</sup> | 0.16           | 0.01           | 0.00           | 0.00           | 0.01           | 0.02           | 0.13           | 0.37           | 0.30           |                |

**Ring <sup>13</sup>C Vanillin + Glyoxylate**

| Amino Acid | TBDMS Fragment       | MID            |                |                |                |                |                |                |                |                |                |
|------------|----------------------|----------------|----------------|----------------|----------------|----------------|----------------|----------------|----------------|----------------|----------------|
|            |                      | M <sub>0</sub> | M <sub>1</sub> | M <sub>2</sub> | M <sub>3</sub> | M <sub>4</sub> | M <sub>5</sub> | M <sub>6</sub> | M <sub>7</sub> | M <sub>8</sub> | M <sub>9</sub> |
| Ala        | [M-57] <sup>+</sup>  | 0.11           | 0.02           | 0.14           | 0.73           |                |                |                |                |                |                |
|            | [M-159] <sup>+</sup> | 0.11           | 0.06           | 0.83           |                |                |                |                |                |                |                |
|            | f(302) <sup>+</sup>  | 0.31           | 0.11           | 0.58           |                |                |                |                |                |                |                |
| Gly        | [M-57] <sup>+</sup>  | 0.29           | 0.24           | 0.47           |                |                |                |                |                |                |                |
|            | [M-85] <sup>+</sup>  | 0.30           | 0.70           |                |                |                |                |                |                |                |                |
| Val        | [M-57] <sup>+</sup>  | 0.23           | 0.01           | 0.00           | 0.02           | 0.14           | 0.60           |                |                |                |                |
|            | [M-159] <sup>+</sup> | 0.22           | 0.01           | 0.01           | 0.08           | 0.68           |                |                |                |                |                |
|            | f(302) <sup>+</sup>  | 0.27           | 0.10           | 0.63           |                |                |                |                |                |                |                |
| Leu        | [M-15] <sup>+</sup>  | 0.19           | 0.03           | 0.04           | 0.01           | 0.03           | 0.14           | 0.56           |                |                |                |
|            | [M-159] <sup>+</sup> | 0.20           | 0.06           | 0.00           | 0.02           | 0.09           | 0.63           |                |                |                |                |
|            | f(302) <sup>+</sup>  | 0.63           | 0.04           | 0.33           |                |                |                |                |                |                |                |
| Ile        | [M-15] <sup>+</sup>  | 0.25           | 0.04           | 0.09           | 0.00           | 0.08           | 0.35           | 0.19           |                |                |                |
|            | [M-159] <sup>+</sup> | 0.30           | 0.02           | 0.06           | 0.03           | 0.17           | 0.42           |                |                |                |                |
|            | f(302) <sup>+</sup>  | 0.58           | 0.19           | 0.23           |                |                |                |                |                |                |                |
| Meth       | [M-57] <sup>+</sup>  | 0.23           | 0.02           | 0.05           | 0.50           | 0.19           | 0.01           |                |                |                |                |
|            | [M-159] <sup>+</sup> | 0.24           | 0.04           | 0.18           | 0.54           | 0.00           |                |                |                |                |                |
|            | f(302) <sup>+</sup>  | 0.19           | 0.36           | 0.45           |                |                |                |                |                |                |                |
| Pro        | [M-57] <sup>+</sup>  | 0.26           | 0.02           | 0.01           | 0.03           | 0.20           | 0.48           |                |                |                |                |
|            | [M-159] <sup>+</sup> | 0.26           | 0.01           | 0.02           | 0.08           | 0.63           |                |                |                |                |                |
|            | f(302) <sup>+</sup>  | 0.09           | 0.19           | 0.72           |                |                |                |                |                |                |                |
| Ser        | [M-57] <sup>+</sup>  | 0.16           | 0.15           | 0.42           | 0.27           |                |                |                |                |                |                |
|            | [M-159] <sup>+</sup> | 0.17           | 0.42           | 0.41           |                |                |                |                |                |                |                |
|            | f(302) <sup>+</sup>  | 0.18           | 0.28           | 0.54           |                |                |                |                |                |                |                |
| Thr        | [M-57] <sup>+</sup>  | 0.17           | 0.02           | 0.07           | 0.55           | 0.19           |                |                |                |                |                |
|            | [M-85] <sup>+</sup>  | 0.17           | 0.03           | 0.21           | 0.59           |                |                |                |                |                |                |
|            | f(302) <sup>+</sup>  | 0.13           | 0.30           | 0.57           |                |                |                |                |                |                |                |
| Phe        | [M-57] <sup>+</sup>  | 0.31           | 0.02           | 0.00           | 0.00           | 0.00           | 0.02           | 0.05           | 0.17           | 0.26           | 0.17           |
|            | [M-159] <sup>+</sup> | 0.31           | 0.02           | 0.00           | 0.00           | 0.01           | 0.02           | 0.11           | 0.27           | 0.26           |                |
|            | f(302) <sup>+</sup>  | 0.35           | 0.23           | 0.42           |                |                |                |                |                |                |                |
| Asp        | [M-57] <sup>+</sup>  | 0.05           | 0.01           | 0.08           | 0.59           | 0.27           |                |                |                |                |                |
|            | [M-159] <sup>+</sup> | 0.05           | 0.04           | 0.24           | 0.67           |                |                |                |                |                |                |
|            | f(302) <sup>+</sup>  | 0.08           | 0.44           | 0.48           |                |                |                |                |                |                |                |
| Glu        | [M-57] <sup>+</sup>  | 0.05           | 0.01           | 0.02           | 0.05           | 0.24           | 0.63           |                |                |                |                |
|            | [M-159] <sup>+</sup> | 0.05           | 0.01           | 0.04           | 0.12           | 0.78           |                |                |                |                |                |
|            | f(302) <sup>+</sup>  | 0.10           | 0.18           | 0.72           |                |                |                |                |                |                |                |
| Lys        | [M-57] <sup>+</sup>  | 0.29           | 0.02           | 0.00           | 0.01           | 0.06           | 0.32           | 0.30           |                |                |                |
|            | [M-159] <sup>+</sup> | 0.29           | 0.02           | 0.01           | 0.03           | 0.18           | 0.47           |                |                |                |                |
|            | f(302) <sup>+</sup>  | 0.22           | 0.15           | 0.63           |                |                |                |                |                |                |                |
| His        | [M-57] <sup>+</sup>  | 0.27           | 0.02           | 0.01           | 0.06           | 0.26           | 0.35           | 0.03           |                |                |                |
|            | [M-159] <sup>+</sup> | 0.26           | 0.03           | 0.07           | 0.25           | 0.35           | 0.04           |                |                |                |                |
|            | f(302) <sup>+</sup>  | 0.31           | 0.17           | 0.52           |                |                |                |                |                |                |                |
| Tyr        | [M-57] <sup>+</sup>  | 0.18           | 0.02           | 0.00           | 0.00           | 0.01           | 0.02           | 0.06           | 0.19           | 0.31           | 0.21           |
|            | [M-159] <sup>+</sup> | 0.19           | 0.01           | 0.00           | 0.00           | 0.01           | 0.03           | 0.12           | 0.32           | 0.32           |                |
|            | f(302) <sup>+</sup>  | 0.22           | 0.27           | 0.51           |                |                |                |                |                |                |                |

**Table S2: Flux values and 95% confidence intervals**

| Metabolic Reactions                | Gene locus / Gene name                                 | Best fit | 95LB  | 95UB  |
|------------------------------------|--------------------------------------------------------|----------|-------|-------|
| 'Vanillin == OAA'                  | *                                                      | 100.0    | 100.0 | 100.0 |
| 'Vanillin == PYR'                  | *                                                      | 100.0    | 100.0 | 100.0 |
| 'Vanillin == Methyl_THF'           | *                                                      | 100.0    | 100.0 | 100.0 |
| 'G6P == F6P'                       | SLG_24770<br><i>pgi</i>                                | -2.0     | -2.0  | -2.0  |
| 'F6P == DHAP + GAP'                | SLG_20410;<br>SLG_23320                                | -9.7     | -9.8  | -9.5  |
| 'DHAP == GAP'                      | SLG_25820<br><i>tpiA</i>                               | -9.7     | -9.8  | -9.5  |
| 'GAP == 3PG'                       | SLG_23350;<br>SLG_23340<br><i>pgk</i>                  | -25.3    | -25.7 | -24.8 |
| '3PG == PEP'                       | SLG_05370<br><i>gpm</i> ;<br>SLG_24020<br><i>eno</i>   | -40.3    | -41.2 | -39.2 |
| 'PEP == PYR'                       | SLG_05190<br><i>pyk</i>                                | 18.2     | 10.1  | 27.7  |
| 'PYR == AceCoA + CO <sub>2</sub> ' | SLG_11810;<br>SLG_18980                                | 98.9     | 96.9  | 103.9 |
| 'AceCoA + OAA == CIT'              | SLG_25260<br><i>glfA</i>                               | 70.2     | 68.3  | 73.1  |
| 'CIT == ICIT'                      | SLG_11220                                              | 70.2     | 68.3  | 73.1  |
| 'ICIT == AKG + CO <sub>2</sub> '   | SLG_15400<br><i>icd</i>                                | 68.5     | 65.2  | 71.1  |
| 'AKG == SucCoA + CO <sub>2</sub> ' | SLG_00740<br><i>sucA</i> ;<br>SLG_00730<br><i>sucB</i> | 58.0     | 54.7  | 60.8  |
| 'SucCoA == SUC'                    | SLG_00720<br><i>sucD</i>                               | 53.4     | 50.1  | 56.3  |
| 'SUC == FUM'                       | SLG_00660<br><i>sdhB</i>                               | 59.7     | 57.7  | 62.8  |
| 'FUM == MAL'                       | SLG_04850<br><i>fumA/fumB</i>                          | 63.3     | 61.3  | 66.3  |
| 'MAL == OAA'                       | SLG_00710<br><i>mdh</i>                                | 58.7     | 50.4  | 69.0  |
| 'MAL == PYR + CO <sub>2</sub> '    | SLG_38170<br><i>maeB</i>                               | 6.3      | 0.0   | 14.4  |
| 'PEP + CO <sub>2</sub> == OAA'     | SLG_14800<br><i>pckA</i>                               | -66.1    | -74.9 | -57.9 |
| 'ICIT == GLX + SUC'                | SLG_09310                                              | 1.7      | 0.0   | 5.5   |
| 'GLX + AceCoA == MAL'              | SLG_02210<br><i>glcB</i>                               | 1.7      | 0.0   | 5.5   |
| 'Ru5P == X5P'                      | SLG_01700<br><i>rpe</i>                                | -7.0     | -7.1  | -6.8  |
| 'Ru5P == R5P'                      | SLG_29730<br><i>rpiB</i>                               | 7.0      | 6.8   | 7.1   |
| 'X5P + R5P == GAP + S7P'           | SLG_23360                                              | -1.7     | -1.8  | -1.7  |

|                                                                             |                                                                                      |      |      |      |
|-----------------------------------------------------------------------------|--------------------------------------------------------------------------------------|------|------|------|
| 'GAP + S7P == E4P + F6P'                                                    | SLG_37260<br><i>tal</i>                                                              | -1.7 | -1.8 | -1.7 |
| 'X5P + E4P == GAP + F6P'                                                    | SLG_23360                                                                            | -5.3 | -5.3 | -5.1 |
| 'PG6 == PYR + GAP'                                                          | SLG_32090<br><i>edd</i> ;<br>SLG_32110                                               | 0.0  | 0.0  | 0.0  |
| 'AceCoA == Ac'                                                              | SLG_00120<br><i>acs</i>                                                              | -5.0 | -5.1 | -4.9 |
| 'AKG == GLU'                                                                | SLG_29280<br><i>glhD</i>                                                             | 63.0 | 61.6 | 63.9 |
| 'GLU == GLN'                                                                | SLG_12030<br><i>glnA</i>                                                             | 6.6  | 6.4  | 6.6  |
| 'GLU == PRO'                                                                | SLG_01040<br><i>proB</i> ;<br>SLG_06160<br><i>proA</i> ;<br>SLG_07390<br><i>proC</i> | 2.0  | 2.0  | 2.1  |
| 'GLU + GLN + CO <sub>2</sub> + ASP + AceCoA == ARG + AKG + FUM + Ac'        | *                                                                                    | 2.7  | 2.7  | 2.8  |
| 'OAA + GLU == ASP + AKG'                                                    | SLG_37020<br><i>aspB</i>                                                             | 19.1 | 18.5 | 19.7 |
| 'ASP == ASN'                                                                | SLG_19730                                                                            | 2.2  | 2.2  | 2.3  |
| 'PYR == ALA'                                                                | SLG_17620<br><i>ald</i>                                                              | 4.7  | 4.6  | 4.8  |
| 'G3P + GLU == SER + AKG'                                                    | SLG_01250<br><i>serA</i> ;<br>SLG_01240<br><i>serC</i> ;<br>SLG_20680<br><i>serB</i> | 9.0  | 8.3  | 9.6  |
| 'SER == GLY + Methylene_THF'                                                | SLG_29740<br><i>glyA</i>                                                             | 4.2  | 3.6  | 4.8  |
| 'Methylene_THF == Methyl_THF'                                               | SLG_12750<br><i>metF</i>                                                             | -1.0 | -1.7 | -0.4 |
| 'Methylene_THF == Formyl_THF'                                               | SLG_03300<br><i>folD</i>                                                             | 0.9  | 0.9  | 0.9  |
| 'ASP == THR'                                                                | *                                                                                    | 6.5  | 5.9  | 7.1  |
| 'THR == GLY + AceCoA'                                                       | SLG_38980<br><i>ltaA</i>                                                             | 1.5  | 0.9  | 2.0  |
| 'SER + AceCoA == CYS + Ac'                                                  | SLG_08850<br><i>cysE</i> ;<br>SLG_05810<br><i>cysK</i>                               | 2.3  | 2.2  | 2.3  |
| 'ASP + PYR + GLU + SucCoA == LYS + CO <sub>2</sub> + AKG + SUC'             | *                                                                                    | 3.2  | 3.1  | 3.2  |
| 'ASP + Methyl_THF + AceCoA == MET + Ac'                                     |                                                                                      | 1.4  | 1.4  | 1.4  |
| 'GLU + 2*PYR == VAL + AKG + CO <sub>2</sub> '                               | *                                                                                    | 3.9  | 3.8  | 4.0  |
| 'AceCoA + 2*PYR + GLU == LEU + AKG + 2*CO <sub>2</sub> '                    | *                                                                                    | 4.2  | 4.1  | 4.2  |
| 'THR + PYR + GLU == ILE + AKG + CO <sub>2</sub> '                           | *                                                                                    | 2.7  | 2.6  | 2.7  |
| 'E4P + 2*PEP + GLU == PHE + AKG + CO <sub>2</sub> '                         | *                                                                                    | 1.7  | 1.7  | 1.7  |
| 'E4P + 2*PEP + GLU == TYR + AKG + NADH + CO <sub>2</sub> '                  | *                                                                                    | 1.3  | 1.2  | 1.3  |
| 'SER + R5P + 2*PEP + E4P + GLN == TRP + GAP + PYR + GLU + CO <sub>2</sub> ' | *                                                                                    | 0.5  | 0.5  | 0.5  |

|                                                                                                                                                                                                                                                                                                                                                      |    |       |       |       |
|------------------------------------------------------------------------------------------------------------------------------------------------------------------------------------------------------------------------------------------------------------------------------------------------------------------------------------------------------|----|-------|-------|-------|
| 'R5P + Formyl_THF + GLN + ASP == HIS + AKG + FUM '                                                                                                                                                                                                                                                                                                   | ** | 0.9   | 0.9   | 0.9   |
| 'CO <sub>2</sub> == CO <sub>2</sub> _Ex'                                                                                                                                                                                                                                                                                                             |    | 414.2 | 409.2 | 422.5 |
| 'CO <sub>2</sub> _air + CO <sub>2</sub> == CO <sub>2</sub> + CO <sub>2</sub> _air'                                                                                                                                                                                                                                                                   |    | 1.1   | 0.0   | 18.0  |
| '0.488*ALA+0.281*ARG+0.229*ASN+0.229*ASP+0.087*CYS+0.250*GLU+0.250*GLN+0.582*GLY+0.090*HIS+0.276*ILE+0.428*LEU+0.326*LYS+0.146*MET+0.176*PHE+0.210*PRO+0.205*SER+0.241*THR+0.054*TRP+0.131*TYR+0.402*VAL+0.205*G6P+0.071*F6P+0.754*R5P+0.129*GAP+0.619*G3P+0.051*PEP+0.083*PYR+2.510* AceCoA+0.087*AKG+0.340*OAA+0.443*Methylene_THF==39.68*Biomass' |    | 9.7   | 9.5   | 9.8   |
| 'Methyl_THF == CO <sub>2</sub> '                                                                                                                                                                                                                                                                                                                     |    | 97.5  | 96.9  | 98.2  |
| Reversibility Coefficient of Reaction 4                                                                                                                                                                                                                                                                                                              |    | 0.45  | 0.33  | 0.68  |
| Reversibility Coefficient of Reaction 5                                                                                                                                                                                                                                                                                                              |    | 1.00  | 0.87  | 1.00  |
| Reversibility Coefficient of Reaction 6                                                                                                                                                                                                                                                                                                              |    | 1.00  | 0.92  | 1.00  |
| Reversibility Coefficient of Reaction 7                                                                                                                                                                                                                                                                                                              |    | 1.00  | 1.00  | 1.00  |
| Reversibility Coefficient of Reaction 8                                                                                                                                                                                                                                                                                                              |    | 1.00  | 1.00  | 1.00  |
| Reversibility Coefficient of Reaction 9                                                                                                                                                                                                                                                                                                              |    | 0.41  | 0.38  | 0.43  |
| Reversibility Coefficient of Reaction 12                                                                                                                                                                                                                                                                                                             |    | 0.13  | 0.14  | 0.72  |
| Reversibility Coefficient of Reaction 13                                                                                                                                                                                                                                                                                                             |    | 0.00  | 0.00  | 0.67  |
| Reversibility Coefficient of Reaction 15                                                                                                                                                                                                                                                                                                             |    | 0.04  | 0.00  | 0.99  |
| Reversibility Coefficient of Reaction 16                                                                                                                                                                                                                                                                                                             |    | 0.17  | 0.00  | 0.98  |
| Reversibility Coefficient of Reaction 17                                                                                                                                                                                                                                                                                                             |    | 1.00  | 0.77  | 1.00  |
| Reversibility Coefficient of Reaction 18                                                                                                                                                                                                                                                                                                             |    | 0.75  | 0.74  | 0.99  |
| Reversibility Coefficient of Reaction 20                                                                                                                                                                                                                                                                                                             |    | 0.22  | 0.14  | 0.26  |
| Reversibility Coefficient of Reaction 25                                                                                                                                                                                                                                                                                                             |    | 1.00  | 1.00  | 1.00  |
| Reversibility Coefficient of Reaction 26                                                                                                                                                                                                                                                                                                             |    | 1.00  | 1.00  | 1.00  |
| Reversibility Coefficient of Reaction 27                                                                                                                                                                                                                                                                                                             |    | 0.16  | 0.14  | 0.24  |
| Reversibility Coefficient of Reaction 28                                                                                                                                                                                                                                                                                                             |    | 0.72  | 0.30  | 0.99  |
| Reversibility Coefficient of Reaction 29                                                                                                                                                                                                                                                                                                             |    | 0.18  | 0.15  | 0.22  |
| Reversibility Coefficient of Reaction 40                                                                                                                                                                                                                                                                                                             |    | 0.11  | 0.10  | 0.12  |
| Reversibility Coefficient of Reaction 41                                                                                                                                                                                                                                                                                                             |    | 0.00  | 0.00  | 0.00  |
| Simulated ratio of 13C aldehyde                                                                                                                                                                                                                                                                                                                      |    | 0.52  | 0.51  | 0.52  |

**Note:** The flux values are represented as the relative values to a vanillin uptake rate of 100.

Many genes have multiple loci and only one of the loci is presented in this table for representative purpose.

\* These conversions involve more than 3 reactions and their annotation has been verified in the KEGG database.

\*\* Histidine synthesis involves 10 reactions steps from R5P and all of it except one is annotated in the KEGG database.
